# Supplementary material for: A Fractional (<em>q</em>,<em> q′</em>) Non-extensive Information Dimension of Complex Networks
Source: Preprints.org preprint supplement (doi:10.20944/preprints202309.0660.v1), 2023-09-11
Supplement: Supplementary file 1 [file supplementary]

A fractional (q, q’) non-extensive information dimension of complex network

**Barabasi-Albert Networks**

The Barabasi-Albert (BA) model generated 225 networks listed in Table S1. The model is tuned using the total nodes(***n***) of the network, the initial nodes (*n0*) and the average node degree (*ad*). The network name was given following the pattern BA*-n-n0-ad,* p.e BA-3500-8-4 means a network with 3500 nodes that was generated using eight initial nodes with an average node degree of 4.

**Table S1.** The SBICR of information model Eq.(8) and the fractional (*q, q’* ) information model Eq.(10), *dI*, *dq,q′* and the *q*, *q’* values of BA networks.

| **Network** | **Nodes** | **Edges** | ***SBICRI*** | ***SBICR(q,q′ )*** | ***dI*** | ***dq,q′*** | ***q*** | ***q'*** |
| --- | --- | --- | --- | --- | --- | --- | --- | --- |
| BA-2000-10-1 | 2000 | 2779 | -66.469 | -61.918 | 4.092 | 1.506 | 1.365 | **1.003** |
| BA-2000-10-2 | 2000 | 4244 | -45.812 | -41.061 | 4.585 | 1.471 | 1.394 | 0.998 |
| BA-2000-10-3 | 2000 | 6056 | -35.015 | -30.950 | 4.966 | 1.492 | 1.406 | 0.996 |
| BA-2000-10-4 | 2000 | 8012 | -29.250 | -25.619 | 5.250 | 1.490 | 1.419 | 0.995 |
| BA-2000-10-5 | 2000 | 9996 | -29.144 | -25.289 | 6.038 | 1.572 | 1.494 | 0.997 |
| BA-2000-10-6 | 2000 | 11986 | -22.879 | -19.331 | 5.653 | 1.403 | 1.447 | 0.994 |
| BA-2000-10-7 | 2000 | 13975 | -23.357 | -20.219 | 6.531 | 1.701 | 1.489 | 0.993 |
| BA-2000-10-8 | 2000 | 15965 | -23.335 | -20.339 | 6.964 | 1.729 | 1.531 | 0.997 |
| BA-2000-10-9 | 2000 | 17955 | -13.803 | -10.303 | 4.782 | 0.864 | 1.404 | 0.996 |
| BA-2000-2-1 | 2000 | 2701 | -77.869 | -71.848 | 4.045 | 1.562 | 1.345 | **1.003** |
| BA-2000-3-1 | 2000 | 2724 | -81.969 | -75.237 | 3.984 | 1.466 | 1.355 | **1.010** |
| BA-2000-3-2 | 2000 | 4191 | -46.109 | -41.367 | 4.552 | 1.475 | 1.387 | 0.998 |
| BA-2000-4-1 | 2000 | 2703 | -81.489 | -75.059 | 3.930 | 1.436 | 1.358 | **1.007** |
| BA-2000-4-2 | 2000 | 4162 | -45.961 | -41.318 | 4.549 | 1.470 | 1.386 | 0.998 |
| BA-2000-4-3 | 2000 | 6042 | -35.118 | -31.088 | 4.876 | 1.449 | 1.404 | 0.996 |
| BA-2000-5-1 | 2000 | 2685 | -74.896 | -69.654 | 3.973 | 1.493 | 1.356 | **1.002** |
| BA-2000-5-2 | 2000 | 4223 | -45.960 | -41.193 | 4.581 | 1.483 | 1.390 | 0.997 |
| BA-2000-5-3 | 2000 | 6040 | -35.120 | -31.005 | 4.924 | 1.459 | 1.411 | 0.996 |
| BA-2000-5-4 | 2000 | 7998 | -29.358 | -25.729 | 5.259 | 1.484 | 1.423 | 0.995 |
| BA-2000-6-1 | 2000 | 2799 | -71.407 | -66.250 | 4.132 | 1.533 | 1.361 | **1.004** |
| BA-2000-6-2 | 2000 | 4245 | -46.049 | -41.268 | 4.561 | 1.473 | 1.388 | 0.998 |
| BA-2000-6-3 | 2000 | 6054 | -35.194 | -31.101 | 4.900 | 1.453 | 1.408 | 0.996 |
| BA-2000-6-4 | 2000 | 7998 | -29.256 | -25.561 | 5.233 | 1.475 | 1.423 | 0.995 |
| BA-2000-6-5 | 2000 | 9986 | -29.246 | -25.444 | 6.001 | 1.561 | 1.491 | 0.997 |
| BA-2000-7-1 | 2000 | 2751 | -69.422 | -64.546 | 4.084 | 1.521 | 1.359 | **1.003** |
| BA-2000-7-2 | 2000 | 4216 | -46.066 | -41.268 | 4.535 | 1.456 | 1.390 | 0.997 |
| BA-2000-7-3 | 2000 | 6052 | -35.095 | -31.011 | 4.954 | 1.469 | 1.410 | 0.996 |
| BA-2000-7-4 | 2000 | 7998 | -29.227 | -25.567 | 5.196 | 1.464 | 1.420 | 0.995 |
| BA-2000-7-5 | 2000 | 9989 | -29.194 | -25.355 | 6.025 | 1.568 | 1.492 | 0.997 |
| BA-2000-7-6 | 2000 | 11979 | -22.896 | -19.412 | 5.709 | 1.435 | 1.443 | 0.994 |
| BA-2000-8-1 | 2000 | 2781 | -69.594 | -64.366 | 4.126 | 1.519 | 1.368 | **1.004** |
| BA-2000-8-2 | 2000 | 4214 | -45.430 | -40.750 | 4.564 | 1.456 | 1.394 | 0.997 |
| BA-2000-8-3 | 2000 | 6041 | -35.130 | -31.043 | 4.937 | 1.462 | 1.412 | 0.996 |
| BA-2000-8-4 | 2000 | 8015 | -29.252 | -25.540 | 5.222 | 1.468 | 1.422 | 0.995 |
| BA-2000-8-5 | 2000 | 9988 | -29.190 | -25.300 | 6.041 | 1.565 | 1.497 | 0.997 |
| BA-2000-8-6 | 2000 | 11980 | -22.899 | -19.305 | 5.664 | 1.393 | 1.449 | 0.993 |
| BA-2000-8-7 | 2000 | 13972 | -23.375 | -20.164 | 6.482 | 1.664 | 1.494 | 0.993 |
| BA-2000-9-1 | 2000 | 2763 | -72.528 | -65.485 | 4.055 | 1.474 | 1.368 | **1.010** |
| BA-2000-9-2 | 2000 | 4221 | -45.743 | -41.101 | 4.571 | 1.472 | 1.389 | 0.998 |
| BA-2000-9-3 | 2000 | 6047 | -35.091 | -30.980 | 4.949 | 1.464 | 1.413 | 0.996 |
| BA-2000-9-4 | 2000 | 8008 | -29.229 | -25.554 | 5.225 | 1.474 | 1.421 | 0.995 |
| BA-2000-9-5 | 2000 | 9993 | -29.131 | -25.308 | 6.066 | 1.605 | 1.486 | 0.997 |
| BA-2000-9-6 | 2000 | 11982 | -22.916 | -19.394 | 5.672 | 1.417 | 1.444 | 0.993 |
| BA-2000-9-7 | 2000 | 13973 | -23.469 | -20.347 | 6.531 | 1.707 | 1.487 | 0.994 |
| BA-2000-9-8 | 2000 | 15964 | -23.321 | -20.317 | 6.954 | 1.711 | 1.534 | 0.998 |
| BA-3000-10-1 | 3000 | 4165 | -70.427 | -64.996 | 4.324 | 1.541 | 1.361 | **1.002** |
| BA-3000-10-2 | 3000 | 6365 | -47.296 | -42.116 | 4.621 | 1.382 | 1.388 | 0.998 |
| BA-3000-10-3 | 3000 | 9097 | -36.074 | -31.568 | 4.840 | 1.326 | 1.401 | 0.996 |
| BA-3000-10-4 | 3000 | 12017 | -29.922 | -25.712 | 5.004 | 1.282 | 1.405 | 0.996 |
| BA-3000-10-5 | 3000 | 14998 | -30.372 | -26.375 | 6.088 | 1.543 | 1.472 | 0.997 |
| BA-3000-10-6 | 3000 | 17985 | -23.070 | -18.850 | 5.226 | 1.126 | 1.422 | 0.996 |
| BA-3000-10-7 | 3000 | 20975 | -23.827 | -20.036 | 6.239 | 1.449 | 1.468 | 0.994 |
| BA-3000-10-8 | 3000 | 23965 | -24.155 | -20.717 | 6.966 | 1.667 | 1.513 | 0.994 |
| BA-3000-10-9 | 3000 | 26955 | -24.038 | -20.728 | 7.363 | 1.699 | 1.540 | 0.998 |
| BA-3000-2-1 | 3000 | 4121 | -80.308 | -73.839 | 4.164 | 1.466 | 1.356 | **1.001** |
| BA-3000-3-1 | 3000 | 4067 | -85.249 | -78.052 | 4.229 | 1.510 | 1.359 | **1.005** |
| BA-3000-3-2 | 3000 | 6306 | -47.640 | -42.380 | 4.508 | 1.347 | 1.383 | 0.997 |
| BA-3000-4-1 | 3000 | 4112 | -89.723 | -81.642 | 4.185 | 1.495 | 1.368 | **1.005** |
| BA-3000-4-2 | 3000 | 6301 | -47.430 | -42.204 | 4.481 | 1.340 | 1.379 | 0.997 |
| BA-3000-4-3 | 3000 | 9052 | -36.002 | -31.547 | 4.765 | 1.298 | 1.396 | 0.997 |
| BA-3000-5-1 | 3000 | 4105 | -85.077 | -77.855 | 4.229 | 1.466 | 1.368 | **1.008** |
| BA-3000-5-2 | 3000 | 6275 | -47.438 | -42.300 | 4.472 | 1.349 | 1.376 | 0.998 |
| BA-3000-5-3 | 3000 | 9062 | -36.071 | -31.567 | 4.815 | 1.323 | 1.398 | 0.997 |
| BA-3000-5-4 | 3000 | 12009 | -29.816 | -25.547 | 4.967 | 1.260 | 1.405 | 0.996 |
| BA-3000-6-1 | 3000 | 4049 | -82.091 | -75.163 | 4.176 | 1.507 | 1.357 | **1.003** |
| BA-3000-6-2 | 3000 | 6315 | -47.511 | -42.281 | 4.524 | 1.358 | 1.383 | 0.998 |
| BA-3000-6-3 | 3000 | 9066 | -36.049 | -31.540 | 4.818 | 1.333 | 1.396 | 0.996 |
| BA-3000-6-4 | 3000 | 12010 | -29.850 | -25.593 | 4.960 | 1.267 | 1.405 | 0.996 |
| BA-3000-6-5 | 3000 | 14986 | -30.307 | -26.312 | 6.081 | 1.542 | 1.471 | 0.997 |
| BA-3000-7-1 | 3000 | 4103 | -78.489 | -72.525 | 4.251 | 1.536 | 1.355 | **1.003** |
| BA-3000-7-2 | 3000 | 6277 | -47.365 | -42.138 | 4.507 | 1.342 | 1.385 | 0.997 |
| BA-3000-7-3 | 3000 | 9068 | -36.023 | -31.540 | 4.779 | 1.306 | 1.398 | 0.997 |
| BA-3000-7-4 | 3000 | 12002 | -29.921 | -25.646 | 5.002 | 1.259 | 1.413 | 0.996 |
| BA-3000-7-5 | 3000 | 14986 | -30.343 | -26.382 | 6.071 | 1.548 | 1.467 | 0.997 |
| BA-3000-7-6 | 3000 | 17979 | -22.976 | -18.643 | 5.150 | 1.079 | 1.426 | 0.996 |
| BA-3000-8-1 | 3000 | 4176 | -73.343 | -67.607 | 4.336 | 1.581 | 1.351 | **1.002** |
| BA-3000-8-2 | 3000 | 6340 | -47.464 | -42.239 | 4.592 | 1.375 | 1.389 | 0.998 |
| BA-3000-8-3 | 3000 | 9090 | -35.989 | -31.502 | 4.873 | 1.345 | 1.398 | 0.996 |
| BA-3000-8-4 | 3000 | 12005 | -29.911 | -25.687 | 4.975 | 1.266 | 1.406 | 0.996 |
| BA-3000-8-5 | 3000 | 14990 | -30.339 | -26.366 | 6.054 | 1.538 | 1.469 | 0.997 |
| BA-3000-8-6 | 3000 | 17981 | -23.176 | -18.960 | 5.252 | 1.129 | 1.428 | 0.996 |
| BA-3000-8-7 | 3000 | 20972 | -23.948 | -20.185 | 6.275 | 1.463 | 1.470 | 0.994 |
| BA-3000-9-1 | 3000 | 4130 | -75.378 | -68.846 | 4.244 | 1.514 | 1.365 | **1.002** |
| BA-3000-9-2 | 3000 | 6319 | -47.371 | -42.123 | 4.544 | 1.367 | 1.384 | 0.998 |
| BA-3000-9-3 | 3000 | 9065 | -36.025 | -31.518 | 4.825 | 1.315 | 1.402 | 0.997 |
| BA-3000-9-4 | 3000 | 12015 | -29.887 | -25.670 | 4.966 | 1.260 | 1.406 | 0.996 |
| BA-3000-9-5 | 3000 | 14997 | -30.399 | -26.404 | 6.058 | 1.521 | 1.473 | 0.997 |
| BA-3000-9-6 | 3000 | 17984 | -23.056 | -18.850 | 5.211 | 1.121 | 1.421 | 0.996 |
| BA-3000-9-7 | 3000 | 20973 | -23.831 | -20.042 | 6.251 | 1.451 | 1.470 | 0.994 |
| BA-3000-9-8 | 3000 | 23964 | -24.152 | -20.745 | 6.948 | 1.670 | 1.504 | 0.995 |
| BA-3500-10-1 | 3500 | 4787 | -85.739 | -76.844 | 4.180 | 1.381 | 1.391 | **1.008** |
| BA-3500-10-2 | 3500 | 7377 | -47.604 | -42.211 | 4.612 | 1.361 | 1.382 | 0.998 |
| BA-3500-10-3 | 3500 | 10604 | -42.782 | -37.299 | 5.495 | 1.477 | 1.450 | 0.999 |
| BA-3500-10-4 | 3500 | 14022 | -30.112 | -25.680 | 4.869 | 1.191 | 1.400 | 0.997 |
| BA-3500-10-5 | 3500 | 17498 | -30.763 | -26.614 | 6.050 | 1.502 | 1.466 | 0.997 |
| BA-3500-10-6 | 3500 | 20985 | -23.109 | -18.589 | 5.000 | 1.001 | 1.420 | 0.997 |
| BA-3500-10-7 | 3500 | 24475 | -23.991 | -19.945 | 6.087 | 1.340 | 1.461 | 0.995 |
| BA-3500-10-8 | 3500 | 27965 | -24.419 | -20.754 | 6.906 | 1.599 | 1.502 | 0.995 |
| BA-3500-10-9 | 3500 | 31455 | -24.420 | -20.965 | 7.412 | 1.693 | 1.534 | 0.998 |
| BA-3500-2-1 | 3500 | 4762 | -81.989 | -75.090 | 4.259 | 1.513 | 1.348 | **1.001** |
| BA-3500-3-1 | 3500 | 4821 | -96.631 | -86.826 | 4.228 | 1.407 | 1.380 | **1.013** |
| BA-3500-3-2 | 3500 | 7375 | -54.217 | -48.006 | 4.899 | 1.430 | 1.414 | **1.000** |
| BA-3500-4-1 | 3500 | 4767 | -90.652 | -82.469 | 4.252 | 1.490 | 1.367 | **1.005** |
| BA-3500-4-2 | 3500 | 7334 | -47.951 | -42.513 | 4.512 | 1.325 | 1.379 | 0.998 |
| BA-3500-4-3 | 3500 | 10588 | -42.801 | -37.381 | 5.491 | 1.501 | 1.441 | 0.999 |
| BA-3500-5-1 | 3500 | 4818 | -88.698 | -80.496 | 4.212 | 1.450 | 1.374 | **1.004** |
| BA-3500-5-2 | 3500 | 7361 | -48.062 | -42.697 | 4.552 | 1.339 | 1.380 | 0.998 |
| BA-3500-5-3 | 3500 | 10577 | -36.206 | -31.533 | 4.723 | 1.258 | 1.390 | 0.997 |
| BA-3500-5-4 | 3500 | 14000 | -30.051 | -25.539 | 4.847 | 1.175 | 1.400 | 0.996 |
| BA-3500-6-1 | 3500 | 4770 | -85.417 | -77.802 | 4.328 | 1.507 | 1.365 | **1.006** |
| BA-3500-6-2 | 3500 | 7324 | -47.863 | -42.446 | 4.454 | 1.304 | 1.376 | 0.998 |
| BA-3500-6-3 | 3500 | 10585 | -36.260 | -31.551 | 4.732 | 1.248 | 1.394 | 0.997 |
| BA-3500-6-4 | 3500 | 14000 | -30.007 | -25.514 | 4.869 | 1.189 | 1.400 | 0.997 |
| BA-3500-6-5 | 3500 | 17487 | -30.763 | -26.645 | 6.057 | 1.511 | 1.465 | 0.997 |
| BA-3500-7-1 | 3500 | 4813 | -84.680 | -77.075 | 4.315 | 1.534 | 1.361 | **1.003** |
| BA-3500-7-2 | 3500 | 7352 | -47.816 | -42.376 | 4.525 | 1.321 | 1.382 | 0.998 |
| BA-3500-7-3 | 3500 | 10596 | -36.204 | -31.450 | 4.732 | 1.243 | 1.396 | 0.997 |
| BA-3500-7-4 | 3500 | 14014 | -30.058 | -25.519 | 4.844 | 1.160 | 1.404 | 0.997 |
| BA-3500-7-5 | 3500 | 17487 | -30.716 | -26.647 | 6.054 | 1.509 | 1.466 | 0.996 |
| BA-3500-7-6 | 3500 | 20979 | -23.085 | -18.612 | 5.049 | 1.028 | 1.415 | 0.997 |
| BA-3500-8-1 | 3500 | 4783 | -83.015 | -76.172 | 4.296 | 1.490 | 1.368 | **1.005** |
| BA-3500-8-2 | 3500 | 7357 | -47.918 | -42.588 | 4.542 | 1.335 | 1.380 | 0.998 |
| BA-3500-8-3 | 3500 | 10582 | -36.219 | -31.565 | 4.715 | 1.235 | 1.391 | 0.997 |
| BA-3500-8-4 | 3500 | 14014 | -36.867 | -31.683 | 5.902 | 1.508 | 1.469 | 0.998 |
| BA-3500-8-5 | 3500 | 17490 | -30.779 | -26.698 | 6.062 | 1.523 | 1.463 | 0.997 |
| BA-3500-8-6 | 3500 | 20980 | -23.165 | -18.686 | 5.054 | 1.024 | 1.419 | 0.997 |
| BA-3500-8-7 | 3500 | 24472 | -24.019 | -19.968 | 6.090 | 1.340 | 1.460 | 0.995 |
| BA-3500-9-1 | 3500 | 4852 | -78.261 | -71.903 | 4.387 | 1.556 | 1.361 | **1.003** |
| BA-3500-9-2 | 3500 | 7384 | -47.670 | -42.259 | 4.566 | 1.334 | 1.384 | 0.998 |
| BA-3500-9-3 | 3500 | 10598 | -36.267 | -31.552 | 4.722 | 1.244 | 1.396 | 0.997 |
| BA-3500-9-4 | 3500 | 14013 | -30.083 | -25.636 | 4.877 | 1.186 | 1.401 | 0.997 |
| BA-3500-9-5 | 3500 | 17494 | -30.758 | -26.631 | 6.040 | 1.499 | 1.467 | 0.997 |
| BA-3500-9-6 | 3500 | 20982 | -23.066 | -18.486 | 4.997 | 0.984 | 1.422 | 0.997 |
| BA-3500-9-7 | 3500 | 24473 | -24.027 | -19.954 | 6.107 | 1.339 | 1.464 | 0.995 |
| BA-3500-9-8 | 3500 | 27964 | -24.372 | -20.694 | 6.897 | 1.596 | 1.499 | 0.994 |
| BA-4000-10-1 | 4000 | 5538 | -82.604 | -74.769 | 4.373 | 1.492 | 1.372 | **1.005** |
| BA-4000-10-2 | 4000 | 8415 | -54.046 | -47.843 | 4.945 | 1.422 | 1.413 | 1.000 |
| BA-4000-10-3 | 4000 | 12110 | -43.126 | -37.560 | 5.471 | 1.467 | 1.438 | 0.999 |
| BA-4000-10-4 | 4000 | 16016 | -37.191 | -31.912 | 5.920 | 1.481 | 1.468 | 0.998 |
| BA-4000-10-5 | 4000 | 19997 | -31.073 | -26.905 | 6.029 | 1.483 | 1.459 | 0.997 |
| BA-4000-10-6 | 4000 | 23985 | -23.054 | -18.317 | 4.860 | 0.929 | 1.411 | 0.997 |
| BA-4000-10-7 | 4000 | 27975 | -24.049 | -19.741 | 5.925 | 1.227 | 1.456 | 0.996 |
| BA-4000-10-8 | 4000 | 31965 | -24.566 | -20.688 | 6.813 | 1.527 | 1.495 | 0.995 |
| BA-4000-10-9 | 4000 | 35955 | -24.676 | -21.096 | 7.382 | 1.676 | 1.524 | 0.997 |
| BA-4000-2-1 | 4000 | 5372 | -92.077 | -83.762 | 4.325 | 1.504 | 1.363 | **1.004** |
| BA-4000-3-1 | 4000 | 5544 | -92.533 | -83.606 | 4.354 | 1.507 | 1.367 | **1.004** |
| BA-4000-3-2 | 4000 | 8427 | -54.803 | -48.509 | 4.899 | 1.422 | 1.404 | 1.000 |
| BA-4000-4-1 | 4000 | 5427 | -91.977 | -83.580 | 4.262 | 1.438 | 1.364 | **1.006** |
| BA-4000-4-2 | 4000 | 8398 | -54.591 | -48.328 | 4.898 | 1.403 | 1.411 | 0.999 |
| BA-4000-4-3 | 4000 | 12085 | -43.251 | -37.650 | 5.450 | 1.451 | 1.439 | 0.999 |
| BA-4000-5-1 | 4000 | 5452 | -86.568 | -78.858 | 4.351 | 1.515 | 1.359 | **1.002** |
| BA-4000-5-2 | 4000 | 8381 | -54.725 | -48.415 | 4.926 | 1.414 | 1.412 | 1.000 |
| BA-4000-5-3 | 4000 | 12093 | -36.483 | -31.539 | 4.652 | 1.178 | 1.395 | 0.997 |
| BA-4000-5-4 | 4000 | 16007 | -30.133 | -25.401 | 4.790 | 1.116 | 1.398 | 0.997 |
| BA-4000-6-1 | 4000 | 5486 | -90.763 | -82.548 | 4.331 | 1.455 | 1.373 | **1.008** |
| BA-4000-6-2 | 4000 | 8400 | -54.687 | -48.431 | 4.935 | 1.430 | 1.407 | 1.000 |
| BA-4000-6-3 | 4000 | 12079 | -36.528 | -31.657 | 4.639 | 1.198 | 1.386 | 0.997 |
| BA-4000-6-4 | 4000 | 16006 | -37.204 | -31.987 | 5.923 | 1.488 | 1.465 | 0.998 |
| BA-4000-6-5 | 4000 | 19991 | -31.054 | -26.863 | 6.032 | 1.495 | 1.458 | 0.996 |
| BA-4000-7-1 | 4000 | 5455 | -90.334 | -81.650 | 4.333 | 1.440 | 1.376 | **1.010** |
| BA-4000-7-2 | 4000 | 8362 | -48.334 | -42.747 | 4.459 | 1.277 | 1.375 | 0.998 |
| BA-4000-7-3 | 4000 | 12108 | -36.409 | -31.540 | 4.671 | 1.194 | 1.390 | 0.997 |
| BA-4000-7-4 | 4000 | 16002 | -30.104 | -25.395 | 4.772 | 1.113 | 1.397 | 0.997 |
| BA-4000-7-5 | 4000 | 19994 | -31.032 | -26.845 | 6.012 | 1.484 | 1.456 | 0.997 |
| BA-4000-7-6 | 4000 | 23979 | -23.085 | -18.394 | 4.898 | 0.944 | 1.412 | 0.997 |
| BA-4000-8-1 | 4000 | 5447 | -78.487 | -72.253 | 4.420 | 1.561 | 1.354 | **1.002** |
| BA-4000-8-2 | 4000 | 8417 | -48.241 | -42.633 | 4.506 | 1.295 | 1.377 | 0.998 |
| BA-4000-8-3 | 4000 | 12085 | -43.257 | -37.729 | 5.474 | 1.460 | 1.439 | 0.999 |
| BA-4000-8-4 | 4000 | 16024 | -30.190 | -25.499 | 4.783 | 1.127 | 1.396 | 0.997 |
| BA-4000-8-5 | 4000 | 19992 | -31.097 | -26.868 | 5.992 | 1.464 | 1.461 | 0.997 |
| BA-4000-8-6 | 4000 | 23980 | -23.034 | -18.271 | 4.827 | 0.913 | 1.412 | 0.997 |
| BA-4000-8-7 | 4000 | 27972 | -24.065 | -19.766 | 5.944 | 1.241 | 1.455 | 0.996 |
| BA-4000-9-1 | 4000 | 5537 | -83.005 | -76.146 | 4.348 | 1.466 | 1.374 | **1.003** |
| BA-4000-9-2 | 4000 | 8462 | -48.062 | -42.598 | 4.512 | 1.291 | 1.377 | 0.998 |
| BA-4000-9-3 | 4000 | 12098 | -43.132 | -37.554 | 5.492 | 1.461 | 1.441 | 0.999 |
| BA-4000-9-4 | 4000 | 16010 | -37.173 | -31.923 | 5.913 | 1.487 | 1.465 | 0.998 |
| BA-4000-9-5 | 4000 | 19996 | -31.039 | -26.802 | 6.012 | 1.469 | 1.462 | 0.997 |
| BA-4000-9-6 | 4000 | 23983 | -23.073 | -18.380 | 4.865 | 0.934 | 1.412 | 0.997 |
| BA-4000-9-7 | 4000 | 27973 | -24.027 | -19.748 | 5.928 | 1.242 | 1.451 | 0.996 |
| BA-4000-9-8 | 4000 | 31964 | -24.551 | -20.678 | 6.824 | 1.528 | 1.494 | 0.995 |
| BA-4500-10-1 | 4500 | 6234 | -84.428 | -76.837 | 4.451 | 1.510 | 1.371 | **1.004** |
| BA-4500-10-2 | 4500 | 9515 | -54.742 | -48.368 | 5.004 | 1.435 | 1.407 | 1.000 |
| BA-4500-10-3 | 4500 | 13624 | -36.603 | -31.536 | 4.633 | 1.146 | 1.390 | 0.997 |
| BA-4500-10-4 | 4500 | 18022 | -37.521 | -32.185 | 5.931 | 1.460 | 1.465 | 0.999 |
| BA-4500-10-5 | 4500 | 22498 | -31.249 | -26.880 | 5.974 | 1.436 | 1.456 | 0.996 |
| BA-4500-10-6 | 4500 | 26985 | -23.016 | -18.106 | 4.725 | 0.867 | 1.405 | 0.998 |
| BA-4500-10-7 | 4500 | 31475 | -24.095 | -19.567 | 5.805 | 1.154 | 1.450 | 0.996 |
| BA-4500-10-8 | 4500 | 35965 | -24.680 | -20.629 | 6.708 | 1.456 | 1.486 | 0.995 |
| BA-4500-10-9 | 4500 | 40455 | -24.864 | -21.159 | 7.366 | 1.656 | 1.516 | 0.996 |
| BA-4500-2-1 | 4500 | 6205 | -94.116 | -85.504 | 4.415 | 1.488 | 1.370 | **1.005** |
| BA-4500-3-1 | 4500 | 6198 | -88.040 | -80.075 | 4.448 | 1.504 | 1.366 | **1.003** |
| BA-4500-3-2 | 4500 | 9441 | -55.166 | -48.777 | 4.929 | 1.418 | 1.401 | 0.999 |
| BA-4500-4-1 | 4500 | 6219 | -92.900 | -83.884 | 4.400 | 1.468 | 1.372 | **1.005** |
| BA-4500-4-2 | 4500 | 9477 | -54.986 | -48.578 | 4.929 | 1.410 | 1.403 | 0.999 |
| BA-4500-4-3 | 4500 | 13598 | -43.553 | -37.879 | 5.485 | 1.429 | 1.439 | 0.999 |
| BA-4500-5-1 | 4500 | 6147 | -92.429 | -83.882 | 4.375 | 1.474 | 1.370 | **1.005** |
| BA-4500-5-2 | 4500 | 9457 | -55.154 | -48.640 | 4.898 | 1.389 | 1.406 | 0.999 |
| BA-4500-5-3 | 4500 | 13610 | -43.492 | -37.763 | 5.500 | 1.431 | 1.442 | 0.999 |
| BA-4500-5-4 | 4500 | 18010 | -37.495 | -32.144 | 5.923 | 1.455 | 1.465 | 0.999 |
| BA-4500-6-1 | 4500 | 6177 | -86.733 | -78.786 | 4.486 | 1.532 | 1.366 | **1.003** |
| BA-4500-6-2 | 4500 | 9514 | -48.630 | -42.927 | 4.526 | 1.271 | 1.376 | 0.998 |
| BA-4500-6-3 | 4500 | 13622 | -43.542 | -37.834 | 5.500 | 1.444 | 1.437 | 0.999 |
| BA-4500-6-4 | 4500 | 18003 | -37.464 | -32.161 | 5.915 | 1.460 | 1.461 | 0.998 |
| BA-4500-6-5 | 4500 | 22489 | -31.265 | -26.928 | 5.976 | 1.448 | 1.453 | 0.997 |
| BA-4500-7-1 | 4500 | 6234 | -92.063 | -83.448 | 4.417 | 1.496 | 1.373 | **1.004** |
| BA-4500-7-2 | 4500 | 9428 | -55.110 | -48.716 | 4.931 | 1.402 | 1.406 | 0.999 |
| BA-4500-7-3 | 4500 | 13610 | -36.598 | -31.520 | 4.586 | 1.142 | 1.385 | 0.997 |
| BA-4500-7-4 | 4500 | 18018 | -37.454 | -32.130 | 5.937 | 1.460 | 1.464 | 0.998 |
| BA-4500-7-5 | 4500 | 22486 | -31.358 | -27.037 | 5.964 | 1.441 | 1.453 | 0.997 |
| BA-4500-7-6 | 4500 | 26980 | -31.023 | -26.455 | 6.636 | 1.497 | 1.506 | 0.999 |
| BA-4500-8-1 | 4500 | 6096 | -85.235 | -77.540 | 4.463 | 1.538 | 1.363 | **1.003** |
| BA-4500-8-2 | 4500 | 9487 | -54.884 | -48.451 | 4.965 | 1.418 | 1.408 | 1.000 |
| BA-4500-8-3 | 4500 | 13606 | -43.534 | -37.828 | 5.490 | 1.424 | 1.442 | 0.999 |
| BA-4500-8-4 | 4500 | 18017 | -30.170 | -25.285 | 4.652 | 1.043 | 1.391 | 0.997 |
| BA-4500-8-5 | 4500 | 22489 | -31.294 | -26.937 | 5.958 | 1.441 | 1.452 | 0.997 |
| BA-4500-8-6 | 4500 | 26980 | -30.987 | -26.455 | 6.634 | 1.498 | 1.505 | 0.999 |
| BA-4500-8-7 | 4500 | 31472 | -24.113 | -19.611 | 5.809 | 1.157 | 1.450 | 0.996 |
| BA-4500-9-1 | 4500 | 6216 | -85.366 | -77.705 | 4.405 | 1.474 | 1.372 | **1.003** |
| BA-4500-9-2 | 4500 | 9466 | -54.920 | -48.549 | 4.972 | 1.417 | 1.407 | 1.000 |
| BA-4500-9-3 | 4500 | 13605 | -36.501 | -31.419 | 4.596 | 1.119 | 1.391 | 0.997 |
| BA-4500-9-4 | 4500 | 18021 | -30.164 | -25.216 | 4.632 | 1.038 | 1.392 | 0.997 |
| BA-4500-9-5 | 4500 | 22493 | -31.322 | -26.989 | 5.971 | 1.447 | 1.453 | 0.997 |
| BA-4500-9-6 | 4500 | 26985 | -23.009 | -18.136 | 4.704 | 0.867 | 1.404 | 0.998 |
| BA-4500-9-7 | 4500 | 31473 | -24.098 | -19.589 | 5.802 | 1.158 | 1.447 | 0.996 |
| BA-4500-9-8 | 4500 | 35964 | -24.667 | -20.645 | 6.738 | 1.471 | 1.486 | 0.995 |

**Song, Havlin and Makse networks**

The Song, Havlin and Makse (SHM) model generated 211 networks listed in Table S2. The parameters of the model are the number of generations (G), the initial nodes (M), the inner box connections rate (IB), the between box connection rate (BB) and the mode (MODE), where one means assortativity and two hub repulsion The network name was given following the pattern SHM_G-g M-*m* IB-*ib* BB-*bb* MODE-*bb,* p.e SHM_G-4 M-3 IB-0.40 BB-0.20 MODE-2 means an iterative process repeated four times (G-4) that start with three nodes (M-3). The nodes that belong to each box are connected with a ratio of 0.4 (IB-0.40), and the connection between boxes is 0.20 (BB-0.20), following a hub repulsion strategy.

**Table S2.** The SBICR of information model Eq.(8) and the fractional (*q, q’*) information model Eq.(10), *dI*, *dq,q′* and the *q*, *q’* values of SHM networks.

| **Network** | **Nodes** | **Edges** | ***SBICRI*** | ***SBICR(q,q′ )*** | ***dI*** | ***dq,q′*** | ***q*** | ***q'*** |
| --- | --- | --- | --- | --- | --- | --- | --- | --- |
| SHM_G-2 M-2 IB-0.00 BB-0.00 MODE-1 | 14 | 13 | -1.597 | -1.575 | 1.589 | 1.501 | 1.167 | 0.890 |
| SHM_G-2 M-2 IB-0.00 BB-0.00 MODE-2 | 10 | 9 | 5.505 | 5.206 | 1.158 | 1.052 | 1.184 | 0.928 |
| SHM_G-2 M-2 IB-0.00 BB-0.20 MODE-1 | 18 | 25 | 8.671 | 10.959 | 2.545 | 2.290 | 1.233 | 0.864 |
| SHM_G-2 M-2 IB-0.00 BB-0.20 MODE-2 | 14 | 18 | 4.048 | 2.984 | 1.866 | 1.633 | 1.222 | 0.906 |
| SHM_G-2 M-2 IB-0.00 BB-0.40 MODE-1 | 18 | 31 | -2.279 | 2.189 | 2.195 | 1.686 | 1.333 | 0.907 |
| SHM_G-2 M-2 IB-0.00 BB-0.40 MODE-2 | 10 | 15 | 0.773 | 0.776 | 1.316 | 1.285 | 1.200 | 0.841 |
| SHM_G-2 M-2 IB-0.00 BB-0.80 MODE-1 | 22 | 48 | -2.576 | -3.698 | 3.313 | 2.432 | 1.326 | 0.940 |
| SHM_G-2 M-2 IB-0.00 BB-0.80 MODE-2 | 16 | 28 | 3.618 | 3.039 | 2.173 | 1.874 | 1.280 | 0.860 |
| SHM_G-2 M-2 IB-0.00 BB-1.00 MODE-1 | 22 | 53 | 1.220 | -0.913 | 2.609 | 1.859 | 1.412 | 0.882 |
| SHM_G-2 M-2 IB-0.00 BB-1.00 MODE-2 | 18 | 31 | -2.727 | -1.025 | 2.215 | 1.760 | 1.270 | 0.927 |
| SHM_G-2 M-2 IB-0.40 BB-0.00 MODE-1 | 14 | 13 | -1.597 | -1.575 | 1.589 | 1.501 | 1.167 | 0.890 |
| SHM_G-2 M-2 IB-0.40 BB-0.00 MODE-2 | 10 | 9 | 5.505 | 5.206 | 1.158 | 1.052 | 1.184 | 0.928 |
| SHM_G-2 M-2 IB-0.40 BB-0.20 MODE-1 | 18 | 29 | -2.563 | -1.389 | 1.657 | 1.328 | 1.333 | 0.859 |
| SHM_G-2 M-2 IB-0.40 BB-0.20 MODE-2 | 10 | 13 | -2.008 | -1.926 | 1.440 | 1.302 | 1.231 | 0.899 |
| SHM_G-2 M-2 IB-0.40 BB-0.40 MODE-1 | 18 | 35 | 0.587 | -0.465 | 2.465 | 1.864 | 1.360 | 0.903 |
| SHM_G-2 M-2 IB-0.40 BB-0.40 MODE-2 | 12 | 19 | -2.076 | -1.933 | 1.504 | 1.354 | 1.244 | 0.866 |
| SHM_G-2 M-2 IB-0.40 BB-0.80 MODE-1 | 22 | 58 | -4.000 | -4.538 | 2.962 | 1.964 | 1.463 | 0.938 |
| SHM_G-2 M-2 IB-0.40 BB-0.80 MODE-2 | 16 | 36 | -3.956 | -3.856 | 2.312 | 1.748 | 1.385 | 0.931 |
| SHM_G-2 M-2 IB-0.40 BB-1.00 MODE-1 | 22 | 65 | -2.360 | -3.163 | 2.598 | 1.744 | 1.463 | 0.911 |
| SHM_G-2 M-2 IB-1.00 BB-0.00 MODE-1 | 22 | 47 | -5.583 | -3.471 | 1.342 | 0.746 | 1.762 | 0.842 |
| SHM_G-2 M-2 IB-1.00 BB-0.00 MODE-2 | 14 | 27 | -5.489 | -4.773 | 0.938 | 0.705 | 1.500 | 0.868 |
| SHM_G-2 M-2 IB-1.00 BB-0.20 MODE-1 | 26 | 77 | -4.987 | -3.667 | 1.589 | 0.762 | 1.950 | 0.842 |
| SHM_G-2 M-2 IB-1.00 BB-0.20 MODE-2 | 18 | 54 | -5.312 | -4.344 | 0.831 | 0.521 | 1.740 | 0.853 |
| SHM_G-2 M-2 IB-1.00 BB-0.40 MODE-1 | 26 | 83 | -4.623 | -3.490 | 1.670 | 0.804 | 1.950 | 0.856 |
| SHM_G-2 M-2 IB-1.00 BB-0.40 MODE-2 | 14 | 33 | -5.489 | -4.773 | 0.938 | 0.705 | 1.500 | 0.868 |
| SHM_G-2 M-3 IB-0.00 BB-0.00 MODE-1 | 51 | 50 | -13.464 | -13.000 | 2.812 | 2.127 | 1.245 | 0.922 |
| SHM_G-2 M-3 IB-0.00 BB-0.00 MODE-2 | 39 | 38 | -20.097 | -19.232 | 1.770 | 1.382 | 1.255 | 0.917 |
| SHM_G-2 M-3 IB-0.00 BB-0.20 MODE-1 | 63 | 106 | -14.796 | -14.976 | 3.075 | 1.806 | 1.377 | 0.950 |
| SHM_G-2 M-3 IB-0.00 BB-0.20 MODE-2 | 42 | 65 | -3.228 | -3.006 | 2.356 | 1.631 | 1.354 | 0.891 |
| SHM_G-2 M-3 IB-0.00 BB-0.40 MODE-1 | 69 | 155 | -9.246 | -10.267 | 3.411 | 1.979 | 1.353 | 0.954 |
| SHM_G-2 M-3 IB-0.00 BB-0.40 MODE-2 | 51 | 98 | -12.403 | -13.260 | 2.864 | 1.708 | 1.378 | 0.962 |
| SHM_G-2 M-3 IB-0.00 BB-0.80 MODE-1 | 81 | 253 | -6.428 | -9.586 | 3.895 | 1.739 | 1.548 | 0.963 |
| SHM_G-2 M-3 IB-0.00 BB-0.80 MODE-2 | 57 | 150 | 2.978 | -6.159 | 3.342 | 2.004 | 1.383 | 0.932 |
| SHM_G-2 M-3 IB-0.00 BB-1.00 MODE-1 | 87 | 302 | -2.905 | -4.937 | 4.005 | 2.031 | 1.412 | 0.931 |
| SHM_G-2 M-3 IB-0.00 BB-1.00 MODE-2 | 57 | 173 | -1.383 | -7.276 | 3.413 | 1.957 | 1.396 | 0.956 |
| SHM_G-2 M-3 IB-0.40 BB-0.00 MODE-1 | 99 | 227 | -3.726 | -11.737 | 3.122 | 1.322 | 1.630 | 0.918 |
| SHM_G-2 M-3 IB-0.40 BB-0.00 MODE-2 | 69 | 150 | -21.307 | -20.474 | 2.010 | 1.004 | 1.547 | 0.944 |
| SHM_G-2 M-3 IB-0.40 BB-0.20 MODE-1 | 111 | 313 | -9.822 | -10.872 | 3.313 | 1.163 | 1.676 | 0.932 |
| SHM_G-2 M-3 IB-0.40 BB-0.20 MODE-2 | 87 | 257 | -18.304 | -18.476 | 2.700 | 1.081 | 1.680 | 0.961 |
| SHM_G-2 M-3 IB-0.40 BB-0.40 MODE-1 | 117 | 386 | -11.882 | -12.436 | 3.537 | 1.202 | 1.702 | 0.948 |
| SHM_G-2 M-3 IB-0.40 BB-0.40 MODE-2 | 90 | 300 | -11.566 | -10.903 | 2.824 | 1.098 | 1.600 | 0.948 |
| SHM_G-2 M-3 IB-0.40 BB-0.80 MODE-1 | 129 | 520 | -13.198 | -13.534 | 3.873 | 1.268 | 1.737 | 0.963 |
| SHM_G-2 M-3 IB-0.40 BB-0.80 MODE-2 | 90 | 368 | -13.109 | -12.764 | 3.371 | 1.260 | 1.731 | 0.942 |
| SHM_G-2 M-3 IB-0.40 BB-1.00 MODE-1 | 135 | 590 | -12.696 | -13.746 | 4.253 | 1.314 | 1.800 | 0.970 |
| SHM_G-2 M-3 IB-0.40 BB-1.00 MODE-2 | 102 | 413 | -14.611 | -13.941 | 3.730 | 1.364 | 1.707 | 0.967 |
| SHM_G-2 M-3 IB-1.00 BB-0.00 MODE-1 | 177 | 1331 | -19.647 | -8.442 | 2.172 | 0.173 | 4.246 | 0.922 |
| SHM_G-2 M-3 IB-1.00 BB-0.00 MODE-2 | 141 | 1082 | -19.278 | -10.168 | 1.930 | 0.212 | 3.884 | 0.931 |
| SHM_G-2 M-3 IB-1.00 BB-0.20 MODE-1 | 189 | 1534 | -15.465 | -7.635 | 2.386 | 0.183 | 4.505 | 0.906 |
| SHM_G-2 M-3 IB-1.00 BB-0.20 MODE-2 | 135 | 1092 | -15.150 | -7.148 | 1.925 | 0.209 | 3.905 | 0.898 |
| SHM_G-2 M-3 IB-1.00 BB-0.40 MODE-1 | 195 | 1670 | -12.289 | -4.120 | 2.447 | 0.149 | 4.394 | 0.921 |
| SHM_G-2 M-3 IB-1.00 BB-0.40 MODE-2 | 132 | 1108 | -11.148 | -3.435 | 1.625 | 0.127 | 3.792 | 0.897 |
| SHM_G-2 M-3 IB-1.00 BB-0.80 MODE-1 | 207 | 1942 | -12.008 | -4.016 | 2.584 | 0.152 | 4.760 | 0.927 |
| SHM_G-2 M-3 IB-1.00 BB-0.80 MODE-2 | 141 | 1237 | -11.829 | -5.104 | 2.274 | 0.235 | 4.150 | 0.898 |
| SHM_G-2 M-3 IB-1.00 BB-1.00 MODE-1 | 213 | 2114 | -12.880 | -5.655 | 3.020 | 0.243 | 4.880 | 0.926 |
| SHM_G-2 M-3 IB-1.00 BB-1.00 MODE-2 | 147 | 1432 | -12.178 | -5.987 | 2.502 | 0.313 | 4.300 | 0.934 |
| SHM_G-2 M-4 IB-0.00 BB-0.00 MODE-1 | 124 | 123 | -17.719 | -16.546 | 3.457 | 2.170 | 1.279 | 0.939 |
| SHM_G-2 M-4 IB-0.00 BB-0.00 MODE-2 | 104 | 103 | -31.858 | -29.884 | 2.383 | 1.583 | 1.290 | 0.929 |
| SHM_G-2 M-4 IB-0.00 BB-0.20 MODE-1 | 148 | 302 | -18.442 | -18.000 | 3.922 | 1.804 | 1.429 | 0.975 |
| SHM_G-2 M-4 IB-0.00 BB-0.20 MODE-2 | 116 | 212 | -22.970 | -23.005 | 2.913 | 1.392 | 1.447 | 0.969 |
| SHM_G-2 M-4 IB-0.00 BB-0.40 MODE-1 | 164 | 459 | -13.460 | -13.322 | 3.987 | 1.711 | 1.425 | 0.968 |
| SHM_G-2 M-4 IB-0.00 BB-0.40 MODE-2 | 136 | 346 | -14.376 | -16.044 | 3.760 | 1.653 | 1.467 | 0.976 |
| SHM_G-2 M-4 IB-0.00 BB-0.80 MODE-1 | 204 | 777 | -13.740 | -14.440 | 4.838 | 1.772 | 1.543 | 0.980 |
| SHM_G-2 M-4 IB-0.00 BB-0.80 MODE-2 | 164 | 549 | -15.531 | -16.922 | 4.068 | 1.513 | 1.575 | 0.985 |
| SHM_G-2 M-4 IB-0.00 BB-1.00 MODE-1 | 220 | 933 | -13.843 | -14.731 | 4.956 | 1.608 | 1.623 | 0.983 |
| SHM_G-2 M-4 IB-0.00 BB-1.00 MODE-2 | 176 | 700 | -11.190 | -13.659 | 4.619 | 1.745 | 1.534 | 0.979 |
| SHM_G-2 M-4 IB-0.40 BB-0.00 MODE-1 | 316 | 1338 | -16.874 | -13.680 | 3.661 | 0.925 | 1.841 | 0.969 |
| SHM_G-2 M-4 IB-0.40 BB-0.00 MODE-2 | 284 | 1222 | -32.598 | -29.478 | 2.722 | 0.656 | 1.956 | 0.974 |
| SHM_G-2 M-4 IB-0.40 BB-0.20 MODE-1 | 404 | 2025 | -21.120 | -18.275 | 4.348 | 0.832 | 2.092 | 0.966 |
| SHM_G-2 M-4 IB-0.40 BB-0.20 MODE-2 | 316 | 1605 | -26.783 | -23.228 | 3.549 | 0.768 | 2.015 | 0.986 |
| SHM_G-2 M-4 IB-0.40 BB-0.40 MODE-1 | 356 | 1818 | -15.659 | -14.719 | 4.185 | 0.933 | 1.906 | 0.975 |
| SHM_G-2 M-4 IB-0.40 BB-0.40 MODE-2 | 308 | 1638 | -21.892 | -18.998 | 3.887 | 0.847 | 1.954 | 0.980 |
| SHM_G-2 M-4 IB-0.40 BB-0.80 MODE-1 | 396 | 2489 | -14.009 | -13.785 | 4.825 | 0.948 | 2.121 | 0.985 |
| SHM_G-2 M-4 IB-0.40 BB-0.80 MODE-2 | 324 | 1840 | -17.707 | -15.340 | 4.394 | 0.896 | 1.972 | 0.974 |
| SHM_G-2 M-4 IB-0.40 BB-1.00 MODE-1 | 412 | 2476 | -15.337 | -14.688 | 4.730 | 0.901 | 2.093 | 0.983 |
| SHM_G-2 M-4 IB-0.40 BB-1.00 MODE-2 | 376 | 2454 | -17.972 | -15.911 | 4.858 | 0.918 | 2.063 | 0.981 |
| SHM_G-2 M-4 IB-1.00 BB-0.00 MODE-1 | 796 | 15855 | -22.881 | -0.380 | 2.721 | 0.028 | 9.609 | 0.966 |
| SHM_G-2 M-4 IB-1.00 BB-0.00 MODE-2 | 604 | 11964 | -26.024 | -1.853 | 2.133 | 0.032 | 8.441 | 0.978 |
| SHM_G-2 M-4 IB-1.00 BB-0.20 MODE-1 | 820 | 16838 | -18.060 | -0.777 | 2.690 | 0.034 | 9.087 | 0.923 |
| SHM_G-2 M-4 IB-1.00 BB-0.20 MODE-2 | 616 | 12411 | -17.583 | -1.066 | 2.450 | 0.035 | 8.428 | 0.925 |
| SHM_G-2 M-4 IB-1.00 BB-0.40 MODE-1 | 836 | 17298 | -18.838 | -6.289 | 3.319 | 0.080 | 9.524 | 0.947 |
| SHM_G-2 M-4 IB-1.00 BB-0.40 MODE-2 | 728 | 15353 | -18.463 | -4.710 | 2.950 | 0.062 | 9.503 | 0.934 |
| SHM_G-2 M-4 IB-1.00 BB-0.80 MODE-1 | 868 | 18663 | -14.177 | -0.687 | 3.168 | 0.034 | 9.590 | 0.929 |
| SHM_G-2 M-4 IB-1.00 BB-0.80 MODE-2 | 656 | 13870 | -13.584 | -0.707 | 2.601 | 0.034 | 8.987 | 0.911 |
| SHM_G-2 M-4 IB-1.00 BB-1.00 MODE-1 | 884 | 19238 | -14.353 | -0.990 | 3.391 | 0.038 | 9.755 | 0.938 |
| SHM_G-2 M-4 IB-1.00 BB-1.00 MODE-2 | 680 | 14379 | -13.723 | -0.595 | 2.762 | 0.034 | 9.294 | 0.917 |
| SHM_G-3 M-2 IB-0.00 BB-0.00 MODE-1 | 30 | 29 | -10.262 | -10.078 | 1.791 | 1.515 | 1.197 | 0.915 |
| SHM_G-3 M-2 IB-0.00 BB-0.00 MODE-2 | 14 | 13 | -0.428 | -0.128 | 1.239 | 1.061 | 1.214 | 0.943 |
| SHM_G-3 M-2 IB-0.00 BB-0.20 MODE-1 | 64 | 133 | -8.315 | -8.489 | 3.005 | 1.789 | 1.354 | 0.930 |
| SHM_G-3 M-2 IB-0.00 BB-0.20 MODE-2 | 28 | 47 | -6.335 | -6.568 | 2.592 | 2.032 | 1.219 | 0.956 |
| SHM_G-3 M-2 IB-0.00 BB-0.40 MODE-1 | 82 | 218 | -7.040 | -10.462 | 3.616 | 1.822 | 1.435 | 0.954 |
| SHM_G-3 M-2 IB-0.00 BB-0.40 MODE-2 | 24 | 52 | -6.229 | -6.154 | 2.542 | 1.967 | 1.284 | 0.925 |
| SHM_G-3 M-2 IB-0.00 BB-0.80 MODE-1 | 134 | 530 | -9.249 | -12.777 | 4.581 | 1.804 | 1.558 | 0.978 |
| SHM_G-3 M-2 IB-0.00 BB-0.80 MODE-2 | 30 | 86 | -2.597 | -3.916 | 2.660 | 1.861 | 1.356 | 0.916 |
| SHM_G-3 M-2 IB-0.00 BB-1.00 MODE-1 | 136 | 629 | -7.840 | -8.321 | 4.858 | 2.100 | 1.456 | 0.955 |
| SHM_G-3 M-2 IB-0.00 BB-1.00 MODE-2 | 32 | 100 | -0.892 | -1.156 | 2.829 | 2.186 | 1.260 | 0.907 |
| SHM_G-3 M-2 IB-0.40 BB-0.00 MODE-1 | 30 | 29 | -10.262 | -10.078 | 1.791 | 1.515 | 1.197 | 0.915 |
| SHM_G-3 M-2 IB-0.40 BB-0.00 MODE-2 | 14 | 13 | -0.403 | -0.102 | 1.239 | 1.061 | 1.214 | 0.942 |
| SHM_G-3 M-2 IB-0.40 BB-0.20 MODE-1 | 72 | 189 | -9.463 | -9.781 | 2.869 | 1.328 | 1.520 | 0.932 |
| SHM_G-3 M-2 IB-0.40 BB-0.20 MODE-2 | 22 | 40 | -8.184 | -7.984 | 1.780 | 1.384 | 1.301 | 0.919 |
| SHM_G-3 M-2 IB-0.40 BB-0.40 MODE-1 | 84 | 294 | -12.671 | -12.739 | 3.618 | 1.562 | 1.596 | 0.956 |
| SHM_G-3 M-2 IB-0.40 BB-0.40 MODE-2 | 18 | 42 | -2.854 | -2.680 | 1.940 | 1.656 | 1.233 | 0.902 |
| SHM_G-3 M-2 IB-0.40 BB-0.80 MODE-1 | 160 | 801 | -7.782 | -7.840 | 4.148 | 1.258 | 1.596 | 0.962 |
| SHM_G-3 M-2 IB-0.40 BB-0.80 MODE-2 | 22 | 70 | -5.822 | -6.102 | 2.350 | 1.679 | 1.364 | 0.942 |
| SHM_G-3 M-2 IB-0.40 BB-1.00 MODE-1 | 168 | 932 | -9.361 | -8.930 | 4.664 | 1.375 | 1.679 | 0.961 |
| SHM_G-3 M-2 IB-0.40 BB-1.00 MODE-2 | 20 | 70 | -3.976 | -3.595 | 2.144 | 1.674 | 1.341 | 0.879 |
| SHM_G-3 M-2 IB-1.00 BB-0.00 MODE-1 | 150 | 623 | -21.478 | -10.593 | 2.120 | 0.288 | 2.928 | 0.868 |
| SHM_G-3 M-2 IB-1.00 BB-0.00 MODE-2 | 46 | 173 | -16.956 | -10.073 | 1.291 | 0.456 | 2.160 | 0.873 |
| SHM_G-3 M-2 IB-1.00 BB-0.20 MODE-1 | 250 | 1635 | -16.598 | -7.279 | 2.490 | 0.153 | 3.552 | 0.931 |
| SHM_G-3 M-2 IB-1.00 BB-0.20 MODE-2 | 78 | 463 | -14.729 | -10.147 | 1.935 | 0.442 | 2.957 | 0.912 |
| SHM_G-3 M-2 IB-1.00 BB-0.40 MODE-1 | 278 | 2097 | -18.143 | -11.162 | 3.360 | 0.297 | 4.176 | 0.944 |
| SHM_G-3 M-2 IB-1.00 BB-0.40 MODE-2 | 80 | 506 | -10.823 | -5.376 | 1.740 | 0.283 | 3.030 | 0.853 |
| SHM_G-3 M-2 IB-1.00 BB-0.80 MODE-1 | 398 | 4030 | -13.741 | -3.722 | 3.107 | 0.102 | 4.728 | 0.943 |
| SHM_G-3 M-2 IB-1.00 BB-0.80 MODE-2 | 114 | 876 | -11.883 | -5.759 | 2.127 | 0.282 | 3.475 | 0.877 |
| SHM_G-3 M-2 IB-1.00 BB-1.00 MODE-1 | 406 | 4221 | -14.076 | -4.781 | 3.515 | 0.143 | 4.884 | 0.939 |
| SHM_G-3 M-2 IB-1.00 BB-1.00 MODE-2 | 134 | 1202 | -12.378 | -6.063 | 2.360 | 0.304 | 3.975 | 0.915 |
| SHM_G-3 M-3 IB-0.00 BB-0.00 MODE-1 | 159 | 158 | -26.660 | -25.509 | 3.013 | 1.808 | 1.294 | 0.941 |
| SHM_G-3 M-3 IB-0.00 BB-0.00 MODE-2 | 87 | 86 | -35.437 | -34.104 | 2.116 | 1.500 | 1.249 | 0.941 |
| SHM_G-3 M-3 IB-0.00 BB-0.20 MODE-1 | 378 | 1203 | -20.969 | -20.473 | 4.760 | 1.526 | 1.550 | 0.989 |
| SHM_G-3 M-3 IB-0.00 BB-0.20 MODE-2 | 192 | 458 | -19.186 | -21.131 | 3.745 | 1.535 | 1.477 | 0.985 |
| SHM_G-3 M-3 IB-0.00 BB-0.40 MODE-1 | 636 | 2599 | -16.606 | -15.900 | 5.309 | 1.382 | 1.557 | 0.986 |
| SHM_G-3 M-3 IB-0.00 BB-0.40 MODE-2 | 267 | 720 | -17.615 | -18.219 | 4.208 | 1.535 | 1.496 | 0.979 |
| SHM_G-3 M-3 IB-0.00 BB-0.80 MODE-1 | 1050 | 6406 | -16.079 | -16.859 | 6.633 | 1.461 | 1.693 | 0.994 |
| SHM_G-3 M-3 IB-0.00 BB-0.80 MODE-2 | 417 | 1904 | -17.120 | -17.295 | 5.030 | 1.432 | 1.644 | 0.994 |
| SHM_G-3 M-3 IB-0.00 BB-1.00 MODE-1 | 1266 | 8963 | -13.286 | -16.832 | 7.020 | 1.392 | 1.751 | 0.994 |
| SHM_G-3 M-3 IB-0.00 BB-1.00 MODE-2 | 477 | 2090 | -17.628 | -18.779 | 5.062 | 1.365 | 1.673 | 0.992 |
| SHM_G-3 M-3 IB-0.40 BB-0.00 MODE-1 | 1035 | 3404 | -27.170 | -26.584 | 4.182 | 0.738 | 2.012 | 0.942 |
| SHM_G-3 M-3 IB-0.40 BB-0.00 MODE-2 | 549 | 2018 | -38.953 | -34.170 | 3.054 | 0.641 | 1.860 | 0.978 |
| SHM_G-3 M-3 IB-0.40 BB-0.20 MODE-1 | 1590 | 9064 | -25.634 | -22.107 | 5.519 | 0.704 | 2.098 | 0.988 |
| SHM_G-3 M-3 IB-0.40 BB-0.20 MODE-2 | 873 | 4561 | -26.431 | -20.990 | 4.040 | 0.560 | 1.994 | 0.987 |
| SHM_G-3 M-3 IB-0.40 BB-0.40 MODE-1 | 1929 | 14364 | -21.104 | -17.346 | 6.310 | 0.780 | 2.068 | 0.991 |
| SHM_G-3 M-3 IB-0.40 BB-0.40 MODE-2 | 705 | 3934 | -19.604 | -15.576 | 4.459 | 0.660 | 1.896 | 0.986 |
| SHM_G-3 M-3 IB-0.40 BB-0.80 MODE-1 | 2562 | 26884 | -6.882 | -8.215 | 6.186 | 0.369 | 1.999 | 0.994 |
| SHM_G-3 M-3 IB-0.40 BB-0.80 MODE-2 | 1032 | 8016 | -20.570 | -17.223 | 5.849 | 0.846 | 2.098 | 0.992 |
| SHM_G-3 M-3 IB-0.40 BB-1.00 MODE-1 | 2973 | 35526 | -9.367 | -9.681 | 7.140 | 0.522 | 2.045 | 0.994 |
| SHM_G-3 M-3 IB-0.40 BB-1.00 MODE-2 | 1185 | 10264 | -9.482 | -5.483 | 4.737 | 0.263 | 1.971 | 0.989 |
| SHM_G-3 M-3 IB-1.00 BB-0.00 MODE-1 | 7467 | 182123 | -36.522 | -1.394 | 3.937 | 0.017 | 16.103 | 0.960 |
| SHM_G-3 M-3 IB-1.00 BB-0.00 MODE-2 | 3255 | 79322 | -37.764 | -4.976 | 2.921 | 0.022 | 14.022 | 0.952 |
| SHM_G-3 M-3 IB-1.00 BB-0.20 MODE-1 | 8763 | 239323 | -22.249 | 2.112 | 4.560 | 0.010 | 15.310 | 0.971 |
| SHM_G-3 M-3 IB-1.00 BB-0.20 MODE-2 | 3711 | 92591 | -20.736 | 0.296 | 3.468 | 0.018 | 13.691 | 0.945 |
| SHM_G-3 M-3 IB-1.00 BB-0.40 MODE-1 | 9435 | 271289 | -23.283 | -8.093 | 5.662 | 0.062 | 16.238 | 0.986 |
| SHM_G-3 M-3 IB-1.00 BB-0.40 MODE-2 | 4311 | 121645 | -22.015 | -5.009 | 4.530 | 0.039 | 15.333 | 0.965 |
| SHM_G-3 M-3 IB-1.00 BB-0.80 MODE-1 | 10707 | 338945 | -16.706 | 2.183 | 4.072 | 0.007 | 15.789 | 0.976 |
| SHM_G-3 M-3 IB-1.00 BB-0.80 MODE-2 | 4569 | 138067 | -15.464 | 1.862 | 3.105 | 0.009 | 14.734 | 0.963 |
| SHM_G-3 M-3 IB-1.00 BB-1.00 MODE-1 | 11409 | 378119 | -16.744 | 2.508 | 4.314 | 0.007 | 16.302 | 0.977 |
| SHM_G-3 M-3 IB-1.00 BB-1.00 MODE-2 | 4905 | 147296 | -15.848 | 0.978 | 3.623 | 0.013 | 15.172 | 0.956 |
| SHM_G-3 M-4 IB-0.00 BB-0.00 MODE-1 | 508 | 507 | -32.227 | -29.746 | 3.685 | 1.629 | 1.351 | 0.954 |
| SHM_G-3 M-4 IB-0.00 BB-0.00 MODE-2 | 316 | 315 | -47.119 | -43.609 | 2.635 | 1.355 | 1.304 | 0.961 |
| SHM_G-3 M-4 IB-0.00 BB-0.20 MODE-1 | 1676 | 6182 | -25.878 | -23.159 | 5.778 | 1.215 | 1.651 | 0.994 |
| SHM_G-3 M-4 IB-0.00 BB-0.20 MODE-2 | 840 | 2568 | -26.670 | -25.645 | 5.031 | 1.458 | 1.550 | 0.998 |
| SHM_G-3 M-4 IB-0.00 BB-0.40 MODE-1 | 2688 | 13441 | -20.001 | -17.641 | 6.452 | 1.035 | 1.668 | 0.995 |
| SHM_G-3 M-4 IB-0.00 BB-0.40 MODE-2 | 1464 | 5623 | -20.997 | -21.235 | 5.693 | 1.317 | 1.611 | 0.996 |
| SHM_G-3 M-4 IB-0.00 BB-0.80 MODE-1 | 4916 | 37961 | -18.583 | -18.238 | 8.134 | 1.203 | 1.797 | 0.997 |
| SHM_G-3 M-4 IB-0.00 BB-0.80 MODE-2 | 2400 | 15303 | -22.209 | -21.077 | 6.647 | 1.229 | 1.786 | 0.999 |
| SHM_G-3 M-4 IB-0.00 BB-1.00 MODE-1 | 6020 | 53933 | -15.803 | -17.849 | 8.659 | 1.281 | 1.810 | 0.998 |
| SHM_G-3 M-4 IB-0.00 BB-1.00 MODE-2 | 2904 | 19528 | -23.325 | -21.385 | 6.837 | 1.176 | 1.831 | 1.000 |
| SHM_G-3 M-4 IB-0.40 BB-0.00 MODE-1 | 9460 | 114060 | -35.463 | -28.163 | 5.281 | 0.530 | 2.439 | 0.997 |
| SHM_G-3 M-4 IB-0.40 BB-0.00 MODE-2 | 5964 | 50160 | -62.531 | -47.240 | 4.340 | 0.363 | 2.676 | **1.010** |
| SHM_G-3 M-4 IB-0.40 BB-0.20 MODE-1 | 13576 | 148617 | -22.204 | -10.253 | 6.248 | 0.111 | 2.455 | 0.990 |
| SHM_G-3 M-4 IB-0.40 BB-0.20 MODE-2 | 7164 | 71415 | -31.266 | -23.016 | 5.777 | 0.434 | 2.457 | 0.997 |
| SHM_G-3 M-4 IB-0.40 BB-0.40 MODE-1 | 12708 | 199352 | -18.152 | -12.742 | 6.689 | 0.221 | 2.608 | 0.989 |
| SHM_G-3 M-4 IB-0.40 BB-0.40 MODE-2 | 8848 | 107517 | -23.527 | -12.706 | 5.658 | 0.158 | 2.439 | 0.994 |
| SHM_G-3 M-4 IB-0.40 BB-0.80 MODE-1 | 19968 | 374394 | -13.793 | -6.754 | 7.340 | 0.131 | 2.361 | 0.998 |
| SHM_G-3 M-4 IB-0.40 BB-0.80 MODE-2 | 11512 | 182388 | -25.407 | -18.201 | 7.742 | 0.564 | 2.569 | 0.998 |
| SHM_G-3 M-4 IB-0.40 BB-1.00 MODE-1 | 21908 | 466164 | -13.293 | -7.996 | 8.344 | 0.195 | 2.400 | 0.998 |
| SHM_G-3 M-4 IB-0.40 BB-1.00 MODE-2 | 10464 | 170432 | -14.850 | 0.900 | 4.829 | 0.026 | 2.315 | 0.998 |
| SHM_G-4 M-2 IB-0.00 BB-0.00 MODE-1 | 62 | 61 | -21.522 | -20.904 | 1.996 | 1.519 | 1.217 | 0.930 |
| SHM_G-4 M-2 IB-0.00 BB-0.00 MODE-2 | 18 | 17 | -5.500 | -4.768 | 1.269 | 1.045 | 1.229 | 0.949 |
| SHM_G-4 M-2 IB-0.00 BB-0.20 MODE-1 | 298 | 1075 | -15.932 | -15.430 | 4.637 | 1.658 | 1.461 | 0.981 |
| SHM_G-4 M-2 IB-0.00 BB-0.20 MODE-2 | 32 | 62 | -6.427 | -6.590 | 2.764 | 2.131 | 1.261 | 0.920 |
| SHM_G-4 M-2 IB-0.00 BB-0.40 MODE-1 | 488 | 2556 | -16.217 | -16.317 | 5.760 | 1.686 | 1.577 | 0.990 |
| SHM_G-4 M-2 IB-0.00 BB-0.40 MODE-2 | 48 | 123 | -7.726 | -10.548 | 2.828 | 1.712 | 1.387 | 0.948 |
| SHM_G-4 M-2 IB-0.00 BB-0.80 MODE-1 | 1286 | 11988 | -13.121 | -12.250 | 7.853 | 1.737 | 1.584 | 0.993 |
| SHM_G-4 M-2 IB-0.00 BB-0.80 MODE-2 | 104 | 396 | -9.354 | -11.384 | 4.217 | 1.969 | 1.471 | 0.965 |
| SHM_G-4 M-2 IB-0.00 BB-1.00 MODE-1 | 1638 | 22153 | -14.458 | -13.063 | 9.000 | 1.922 | 1.654 | 0.994 |
| SHM_G-4 M-2 IB-0.00 BB-1.00 MODE-2 | 150 | 746 | -12.866 | -12.952 | 4.739 | 1.851 | 1.542 | 0.985 |
| SHM_G-4 M-2 IB-0.40 BB-0.00 MODE-1 | 62 | 61 | -21.522 | -20.904 | 1.996 | 1.519 | 1.217 | 0.930 |
| SHM_G-4 M-2 IB-0.40 BB-0.00 MODE-2 | 18 | 17 | -5.500 | -4.768 | 1.269 | 1.045 | 1.229 | 0.949 |
| SHM_G-4 M-2 IB-0.40 BB-0.20 MODE-1 | 414 | 1897 | -18.143 | -16.115 | 4.719 | 1.161 | 1.673 | 0.979 |
| SHM_G-4 M-2 IB-0.40 BB-0.20 MODE-2 | 28 | 63 | -6.741 | -6.139 | 2.222 | 1.631 | 1.333 | 0.901 |
| SHM_G-4 M-2 IB-0.40 BB-0.40 MODE-1 | 808 | 5518 | -18.681 | -17.009 | 6.079 | 1.136 | 1.873 | 0.993 |
| SHM_G-4 M-2 IB-0.40 BB-0.40 MODE-2 | 84 | 288 | -13.284 | -14.441 | 3.335 | 1.322 | 1.678 | 0.973 |
| SHM_G-4 M-2 IB-0.40 BB-0.80 MODE-1 | 2402 | 30228 | -14.148 | -11.310 | 7.937 | 0.884 | 1.929 | 0.993 |
| SHM_G-4 M-2 IB-0.40 BB-0.80 MODE-2 | 112 | 538 | -12.963 | -13.039 | 4.011 | 1.398 | 1.728 | 0.980 |
| SHM_G-4 M-2 IB-0.40 BB-1.00 MODE-1 | 2526 | 35203 | -15.241 | -12.229 | 8.738 | 1.108 | 1.978 | 0.994 |
| SHM_G-4 M-2 IB-0.40 BB-1.00 MODE-2 | 260 | 1525 | -8.402 | -8.126 | 4.444 | 0.936 | 1.735 | 0.971 |
| SHM_G-4 M-2 IB-1.00 BB-0.00 MODE-1 | 2198 | 18031 | -38.351 | -10.273 | 3.250 | 0.098 | 6.083 | 0.891 |
| SHM_G-4 M-2 IB-1.00 BB-0.00 MODE-2 | 302 | 2374 | -30.929 | -9.622 | 1.852 | 0.119 | 4.214 | 0.879 |
| SHM_G-4 M-2 IB-1.00 BB-0.20 MODE-1 | 5622 | 83811 | -23.701 | -10.429 | 5.575 | 0.105 | 7.974 | 0.988 |
| SHM_G-4 M-2 IB-1.00 BB-0.20 MODE-2 | 704 | 8327 | -18.855 | -2.738 | 2.779 | 0.048 | 6.196 | 0.932 |
| SHM_G-4 M-2 IB-1.00 BB-0.40 MODE-1 | 7024 | 130920 | -16.301 | 1.951 | 3.647 | 0.008 | 8.292 | 0.985 |
| SHM_G-4 M-2 IB-1.00 BB-0.40 MODE-2 | 1010 | 13694 | -20.865 | -10.107 | 3.844 | 0.146 | 7.025 | 0.970 |
| SHM_G-4 M-2 IB-1.00 BB-0.80 MODE-1 | 13298 | 368306 | -17.698 | 3.145 | 5.812 | 0.005 | 10.778 | 0.993 |
| SHM_G-4 M-2 IB-1.00 BB-0.80 MODE-2 | 2380 | 46128 | -15.362 | 0.229 | 3.294 | 0.018 | 9.258 | 0.960 |
| SHM_G-4 M-2 IB-1.00 BB-1.00 MODE-1 | 16548 | 527902 | -17.969 | 1.640 | 6.732 | 0.009 | 12.227 | 0.993 |
| SHM_G-4 M-2 IB-1.00 BB-1.00 MODE-2 | 1422 | 24435 | -15.133 | -1.097 | 3.416 | 0.031 | 8.024 | 0.945 |
| SHM_G-4 M-3 IB-0.00 BB-0.00 MODE-1 | 483 | 482 | -41.155 | -38.640 | 3.237 | 1.523 | 1.336 | 0.952 |
| SHM_G-4 M-3 IB-0.00 BB-0.00 MODE-2 | 183 | 182 | -50.293 | -47.954 | 2.331 | 1.427 | 1.253 | 0.969 |
| SHM_G-4 M-3 IB-0.00 BB-0.20 MODE-1 | 4947 | 39969 | -21.665 | -19.155 | 7.693 | 1.228 | 1.705 | 0.997 |
| SHM_G-4 M-3 IB-0.00 BB-0.20 MODE-2 | 819 | 3264 | -22.837 | -21.373 | 5.453 | 1.619 | 1.523 | 0.996 |
| SHM_G-4 M-3 IB-0.00 BB-0.40 MODE-1 | 10794 | 178909 | -16.087 | -17.580 | 9.519 | 1.277 | 1.854 | 0.999 |
| SHM_G-4 M-3 IB-0.00 BB-0.40 MODE-2 | 1671 | 12011 | -23.832 | -21.741 | 6.529 | 1.366 | 1.726 | **1.001** |
| SHM_G-4 M-3 IB-0.00 BB-0.80 MODE-1 | 28869 | 880475 | -14.511 | -14.030 | 12.689 | 1.527 | 1.742 | 0.999 |
| SHM_G-4 M-3 IB-0.00 BB-0.80 MODE-2 | 5550 | 80645 | -13.018 | -17.345 | 8.749 | 1.420 | 1.759 | 0.999 |
| SHM_G-4 M-3 IB-0.00 BB-1.00 MODE-2 | 5691 | 99784 | -18.053 | -16.811 | 8.895 | 1.320 | 1.847 | 0.999 |
| SHM_G-4 M-3 IB-0.40 BB-0.00 MODE-1 | 4677 | 21449 | -39.283 | -38.038 | 4.533 | 0.610 | 2.056 | 0.997 |
| SHM_G-4 M-3 IB-0.40 BB-0.00 MODE-2 | 5859 | 29366 | -77.174 | -63.212 | 4.047 | 0.429 | 2.292 | **1.006** |
| SHM_G-4 M-3 IB-0.40 BB-0.20 MODE-2 | 10287 | 102665 | -31.172 | -22.943 | 6.943 | 0.526 | 2.380 | 0.998 |
| SHM_G-4 M-3 IB-0.40 BB-0.40 MODE-1 | 36480 | 806723 | -21.619 | -17.559 | 9.263 | 0.554 | 2.665 | 0.999 |
| SHM_G-4 M-3 IB-0.40 BB-0.40 MODE-2 | 16587 | 247921 | -26.382 | -18.996 | 8.046 | 0.633 | 2.393 | 0.999 |
| SHM_G-4 M-3 IB-0.40 BB-0.80 MODE-2 | 27234 | 639037 | -11.567 | -2.599 | 6.438 | 0.036 | 2.269 | 0.999 |
| SHM_G-4 M-4 IB-0.00 BB-0.00 MODE-1 | 2044 | 2043 | -47.290 | -42.607 | 4.006 | 1.249 | 1.409 | 0.963 |

**Watts and Strogatz networks**

Watts and Strogatz model generated 216 networks listed in Table S3. The parameters of the model are the number of nodes of the resulting network (*n*), average node degree (*ad*) and the rewiring probability (*β*). The network name was given following the pattern WS-*n*-*k*-*β.* For example, WS-2000-2-0.2 means a network with 2000 nodes with average degree 4 (2**ad*) and *β*=0.2.

**Table S3.** The SBICR of information model Eq.(8) and the fractional (*q, q’*) information model Eq.(10), *dI*, *dq,q′* and the *q*, *q’* values of WS networks.

| **Network** | **Nodes** | **Edges** | ***SBICRI*** | ***SBICR(q,q′ )*** | ***dI*** | ***dq,q′*** | ***q*** | ***q'*** |
| --- | --- | --- | --- | --- | --- | --- | --- | --- |
| WS-2000-10-0.000000 | 2000 | 20000 | -274.952 | -93.644 | 1.009 | 0.088 | 2.834 | 0.914 |
| WS-2000-10-0.200000 | 2000 | 20000 | -23.228 | -15.180 | 5.444 | 0.359 | 3.024 | 0.987 |
| WS-2000-10-0.400000 | 2000 | 20000 | -7.380 | 3.501 | 3.676 | 0.040 | 2.233 | 0.991 |
| WS-2000-10-0.600000 | 2000 | 20000 | -13.545 | -5.790 | 4.802 | 0.189 | 1.840 | 0.988 |
| WS-2000-10-0.800000 | 2000 | 20000 | -14.677 | -9.310 | 5.553 | 0.586 | 1.575 | 0.985 |
| WS-2000-10-1.000000 | 2000 | 20000 | -14.688 | -9.986 | 5.721 | 0.766 | 1.507 | 0.985 |
| WS-2000-2-0.000000 | 2000 | 4000 | -704.019 | -541.934 | 0.958 | 0.620 | 1.305 | 0.915 |
| WS-2000-2-0.200000 | 2000 | 4000 | -76.308 | -65.854 | 3.428 | 0.768 | 1.599 | 0.996 |
| WS-2000-2-0.400000 | 2000 | 4000 | -65.271 | -56.981 | 4.022 | 1.005 | 1.523 | **1.004** |
| WS-2000-2-0.600000 | 2000 | 4000 | -53.653 | -47.343 | 3.855 | 1.040 | 1.451 | 0.995 |
| WS-2000-2-0.800000 | 2000 | 4000 | -46.389 | -40.635 | 3.405 | 0.872 | 1.409 | 0.993 |
| WS-2000-2-1.000000 | 2000 | 4000 | -46.604 | -41.103 | 3.482 | 0.924 | 1.403 | 0.993 |
| WS-2000-3-0.000000 | 2000 | 6000 | -631.257 | -518.323 | 0.967 | 0.458 | 1.475 | 0.915 |
| WS-2000-3-0.200000 | 2000 | 6000 | -53.661 | -43.937 | 3.964 | 0.616 | 1.868 | 0.996 |
| WS-2000-3-0.400000 | 2000 | 6000 | -42.082 | -35.315 | 4.355 | 0.822 | 1.657 | 0.993 |
| WS-2000-3-0.600000 | 2000 | 6000 | -36.016 | -31.059 | 4.194 | 0.944 | 1.504 | 0.992 |
| WS-2000-3-0.800000 | 2000 | 6000 | -36.131 | -31.631 | 4.438 | 1.096 | 1.473 | 0.993 |
| WS-2000-3-1.000000 | 2000 | 6000 | -36.049 | -31.680 | 4.477 | 1.137 | 1.458 | 0.994 |
| WS-2000-4-0.000000 | 2000 | 8000 | -539.347 | -429.480 | 0.975 | 0.343 | 1.652 | 0.915 |
| WS-2000-4-0.200000 | 2000 | 8000 | -41.750 | -32.582 | 4.187 | 0.504 | 2.062 | 0.992 |
| WS-2000-4-0.400000 | 2000 | 8000 | -28.397 | -20.063 | 3.705 | 0.352 | 1.739 | 0.988 |
| WS-2000-4-0.600000 | 2000 | 8000 | -30.082 | -25.160 | 4.736 | 0.947 | 1.575 | 0.990 |
| WS-2000-4-0.800000 | 2000 | 8000 | -30.421 | -26.317 | 5.057 | 1.224 | 1.506 | 0.993 |
| WS-2000-4-1.000000 | 2000 | 8000 | -30.277 | -26.269 | 5.063 | 1.254 | 1.491 | 0.992 |
| WS-2000-5-0.000000 | 2000 | 10000 | -469.027 | -345.023 | 0.982 | 0.262 | 1.837 | 0.915 |
| WS-2000-5-0.200000 | 2000 | 10000 | -35.685 | -27.555 | 4.314 | 0.425 | 2.272 | 0.991 |
| WS-2000-5-0.400000 | 2000 | 10000 | -30.234 | -24.295 | 4.994 | 0.680 | 1.954 | 0.994 |
| WS-2000-5-0.600000 | 2000 | 10000 | -20.764 | -13.312 | 3.778 | 0.329 | 1.593 | 0.991 |
| WS-2000-5-0.800000 | 2000 | 10000 | -21.823 | -16.052 | 4.236 | 0.633 | 1.485 | 0.989 |
| WS-2000-5-1.000000 | 2000 | 10000 | -22.000 | -16.586 | 4.313 | 0.722 | 1.459 | 0.989 |
| WS-2000-6-0.000000 | 2000 | 12000 | -411.972 | -278.204 | 0.988 | 0.204 | 2.026 | 0.915 |
| WS-2000-6-0.200000 | 2000 | 12000 | -29.438 | -20.383 | 4.220 | 0.316 | 2.388 | 0.986 |
| WS-2000-6-0.400000 | 2000 | 12000 | -21.041 | -11.308 | 4.089 | 0.181 | 1.967 | 0.986 |
| WS-2000-6-0.600000 | 2000 | 12000 | -23.293 | -18.010 | 5.462 | 0.830 | 1.680 | 0.984 |
| WS-2000-6-0.800000 | 2000 | 12000 | -23.887 | -19.790 | 5.895 | 1.305 | 1.555 | 0.984 |
| WS-2000-6-1.000000 | 2000 | 12000 | -23.898 | -20.104 | 5.986 | 1.429 | 1.520 | 0.987 |
| WS-2000-7-0.000000 | 2000 | 14000 | -367.800 | -217.492 | 0.992 | 0.160 | 2.223 | 0.915 |
| WS-2000-7-0.200000 | 2000 | 14000 | -29.618 | -21.756 | 4.775 | 0.401 | 2.659 | 0.993 |
| WS-2000-7-0.400000 | 2000 | 14000 | -23.079 | -16.020 | 5.335 | 0.480 | 2.106 | 0.980 |
| WS-2000-7-0.600000 | 2000 | 14000 | -24.196 | -19.863 | 6.406 | 1.173 | 1.761 | 0.991 |
| WS-2000-7-0.800000 | 2000 | 14000 | -24.204 | -20.537 | 6.613 | 1.440 | 1.619 | 0.996 |
| WS-2000-7-1.000000 | 2000 | 14000 | -24.092 | -20.690 | 6.685 | 1.543 | 1.577 | 0.996 |
| WS-2000-8-0.000000 | 2000 | 16000 | -330.431 | -168.027 | 0.998 | 0.129 | 2.423 | 0.914 |
| WS-2000-8-0.200000 | 2000 | 16000 | -20.374 | -6.658 | 3.812 | 0.069 | 2.640 | 0.983 |
| WS-2000-8-0.400000 | 2000 | 16000 | -23.876 | -18.173 | 6.132 | 0.728 | 2.227 | 0.993 |
| WS-2000-8-0.600000 | 2000 | 16000 | -10.458 | -3.415 | 3.443 | 0.126 | 1.677 | 0.994 |
| WS-2000-8-0.800000 | 2000 | 16000 | -11.673 | -6.146 | 3.839 | 0.322 | 1.492 | 0.994 |
| WS-2000-8-1.000000 | 2000 | 16000 | -11.228 | -6.483 | 3.992 | 0.410 | 1.449 | 0.994 |
| WS-2000-9-0.000000 | 2000 | 18000 | -303.146 | -137.515 | 1.004 | 0.108 | 2.626 | 0.913 |
| WS-2000-9-0.200000 | 2000 | 18000 | -22.234 | -11.441 | 4.661 | 0.170 | 2.843 | 0.977 |
| WS-2000-9-0.400000 | 2000 | 18000 | -23.616 | -17.842 | 6.203 | 0.669 | 2.353 | 0.995 |
| WS-2000-9-0.600000 | 2000 | 18000 | -12.179 | -4.366 | 4.020 | 0.136 | 1.767 | 0.992 |
| WS-2000-9-0.800000 | 2000 | 18000 | -13.432 | -7.763 | 4.664 | 0.409 | 1.539 | 0.991 |
| WS-2000-9-1.000000 | 2000 | 18000 | -13.375 | -8.370 | 4.798 | 0.536 | 1.480 | 0.991 |
| WS-3000-10-0.000000 | 3000 | 30000 | -408.918 | -165.507 | 0.994 | 0.095 | 2.723 | 0.914 |
| WS-3000-10-0.200000 | 3000 | 30000 | -22.849 | -10.770 | 4.910 | 0.135 | 2.977 | 0.980 |
| WS-3000-10-0.400000 | 3000 | 30000 | -10.813 | 10.384 | 3.352 | 0.021 | 2.212 | 0.995 |
| WS-3000-10-0.600000 | 3000 | 30000 | -11.054 | -2.406 | 3.917 | 0.076 | 1.814 | 0.995 |
| WS-3000-10-0.800000 | 3000 | 30000 | -13.289 | -6.705 | 4.521 | 0.273 | 1.560 | 0.994 |
| WS-3000-10-1.000000 | 3000 | 30000 | -13.197 | -7.598 | 4.718 | 0.403 | 1.484 | 0.994 |
| WS-3000-2-0.000000 | 3000 | 6000 | -1009.633 | -782.526 | 0.956 | 0.637 | 1.289 | 0.916 |
| WS-3000-2-0.200000 | 3000 | 6000 | -84.434 | -72.449 | 3.600 | 0.753 | 1.605 | 0.998 |
| WS-3000-2-0.400000 | 3000 | 6000 | -67.547 | -58.655 | 4.058 | 0.969 | 1.518 | 0.999 |
| WS-3000-2-0.600000 | 3000 | 6000 | -61.428 | -53.793 | 4.154 | 1.054 | 1.471 | 0.998 |
| WS-3000-2-0.800000 | 3000 | 6000 | -54.972 | -48.274 | 3.886 | 0.994 | 1.432 | 0.995 |
| WS-3000-2-1.000000 | 3000 | 6000 | -54.804 | -48.290 | 3.954 | 1.026 | 1.429 | 0.996 |
| WS-3000-3-0.000000 | 3000 | 9000 | -915.908 | -772.541 | 0.963 | 0.475 | 1.448 | 0.915 |
| WS-3000-3-0.200000 | 3000 | 9000 | -55.398 | -44.642 | 3.842 | 0.529 | 1.848 | 0.995 |
| WS-3000-3-0.400000 | 3000 | 9000 | -43.266 | -36.210 | 4.167 | 0.694 | 1.644 | 0.994 |
| WS-3000-3-0.600000 | 3000 | 9000 | -43.523 | -36.989 | 4.832 | 1.046 | 1.545 | 0.995 |
| WS-3000-3-0.800000 | 3000 | 9000 | -36.623 | -31.200 | 4.153 | 0.903 | 1.456 | 0.992 |
| WS-3000-3-1.000000 | 3000 | 9000 | -36.607 | -31.369 | 4.182 | 0.946 | 1.441 | 0.993 |
| WS-3000-4-0.000000 | 3000 | 12000 | -791.548 | -655.289 | 0.969 | 0.359 | 1.615 | 0.915 |
| WS-3000-4-0.200000 | 3000 | 12000 | -43.082 | -33.685 | 4.018 | 0.418 | 2.044 | 0.993 |
| WS-3000-4-0.400000 | 3000 | 12000 | -37.144 | -30.449 | 4.737 | 0.657 | 1.814 | 0.994 |
| WS-3000-4-0.600000 | 3000 | 12000 | -29.912 | -23.068 | 4.184 | 0.597 | 1.557 | 0.990 |
| WS-3000-4-0.800000 | 3000 | 12000 | -30.583 | -25.190 | 4.604 | 0.914 | 1.489 | 0.991 |
| WS-3000-4-1.000000 | 3000 | 12000 | -30.644 | -25.608 | 4.700 | 1.012 | 1.465 | 0.991 |
| WS-3000-5-0.000000 | 3000 | 15000 | -689.401 | -535.478 | 0.974 | 0.276 | 1.787 | 0.915 |
| WS-3000-5-0.200000 | 3000 | 15000 | -36.963 | -27.855 | 4.203 | 0.378 | 2.239 | 0.992 |
| WS-3000-5-0.400000 | 3000 | 15000 | -30.976 | -23.813 | 4.819 | 0.570 | 1.901 | 0.991 |
| WS-3000-5-0.600000 | 3000 | 15000 | -31.185 | -26.156 | 5.586 | 0.967 | 1.686 | 0.996 |
| WS-3000-5-0.800000 | 3000 | 15000 | -20.896 | -13.380 | 3.465 | 0.335 | 1.467 | 0.995 |
| WS-3000-5-1.000000 | 3000 | 15000 | -31.012 | -26.783 | 5.844 | 1.269 | 1.538 | 0.997 |
| WS-3000-6-0.000000 | 3000 | 18000 | -606.040 | -434.032 | 0.979 | 0.216 | 1.965 | 0.915 |
| WS-3000-6-0.200000 | 3000 | 18000 | -29.171 | -16.177 | 3.783 | 0.137 | 2.375 | 0.987 |
| WS-3000-6-0.400000 | 3000 | 18000 | -18.574 | -5.693 | 3.303 | 0.056 | 1.957 | 0.993 |
| WS-3000-6-0.600000 | 3000 | 18000 | -22.510 | -14.650 | 4.601 | 0.362 | 1.683 | 0.989 |
| WS-3000-6-0.800000 | 3000 | 18000 | -23.589 | -17.938 | 5.156 | 0.805 | 1.525 | 0.987 |
| WS-3000-6-1.000000 | 3000 | 18000 | -23.603 | -18.304 | 5.226 | 0.901 | 1.493 | 0.987 |
| WS-3000-7-0.000000 | 3000 | 21000 | -543.096 | -354.468 | 0.984 | 0.172 | 2.147 | 0.915 |
| WS-3000-7-0.200000 | 3000 | 21000 | -30.864 | -21.784 | 4.711 | 0.363 | 2.596 | 0.992 |
| WS-3000-7-0.400000 | 3000 | 21000 | -22.251 | -11.711 | 4.621 | 0.176 | 2.094 | 0.985 |
| WS-3000-7-0.600000 | 3000 | 21000 | -24.364 | -18.811 | 6.109 | 0.878 | 1.771 | 0.983 |
| WS-3000-7-0.800000 | 3000 | 21000 | -24.881 | -20.734 | 6.584 | 1.412 | 1.577 | 0.991 |
| WS-3000-7-1.000000 | 3000 | 21000 | -24.853 | -20.941 | 6.638 | 1.513 | 1.543 | 0.992 |
| WS-3000-8-0.000000 | 3000 | 24000 | -490.301 | -281.116 | 0.987 | 0.139 | 2.335 | 0.915 |
| WS-3000-8-0.200000 | 3000 | 24000 | -30.238 | -21.636 | 5.066 | 0.361 | 2.828 | 0.994 |
| WS-3000-8-0.400000 | 3000 | 24000 | -24.019 | -16.624 | 5.858 | 0.494 | 2.226 | 0.982 |
| WS-3000-8-0.600000 | 3000 | 24000 | -24.912 | -19.978 | 6.782 | 1.055 | 1.838 | 0.997 |
| WS-3000-8-0.800000 | 3000 | 24000 | -24.895 | -20.860 | 7.004 | 1.390 | 1.640 | 0.998 |
| WS-3000-8-1.000000 | 3000 | 24000 | -24.779 | -21.060 | 7.080 | 1.511 | 1.588 | 0.998 |
| WS-3000-9-0.000000 | 3000 | 27000 | -444.903 | -220.929 | 0.991 | 0.114 | 2.525 | 0.915 |
| WS-3000-9-0.200000 | 3000 | 27000 | -21.096 | -5.269 | 3.979 | 0.049 | 2.786 | 0.985 |
| WS-3000-9-0.400000 | 3000 | 27000 | -24.522 | -18.085 | 6.403 | 0.654 | 2.354 | 0.993 |
| WS-3000-9-0.600000 | 3000 | 27000 | -24.633 | -19.591 | 6.874 | 0.957 | 1.937 | 0.997 |
| WS-3000-9-0.800000 | 3000 | 27000 | -11.344 | -5.219 | 3.830 | 0.232 | 1.512 | 0.996 |
| WS-3000-9-1.000000 | 3000 | 27000 | -10.957 | -5.737 | 3.989 | 0.317 | 1.458 | 0.996 |
| WS-3500-10-0.000000 | 3500 | 35000 | -473.748 | -204.444 | 0.990 | 0.098 | 2.680 | 0.915 |
| WS-3500-10-0.200000 | 3500 | 35000 | -22.253 | -7.446 | 4.529 | 0.069 | 2.966 | 0.983 |
| WS-3500-10-0.400000 | 3500 | 35000 | -24.695 | -18.025 | 6.612 | 0.617 | 2.451 | 0.997 |
| WS-3500-10-0.600000 | 3500 | 35000 | -10.508 | -1.707 | 3.699 | 0.062 | 1.791 | 0.996 |
| WS-3500-10-0.800000 | 3500 | 35000 | -12.369 | -5.656 | 4.201 | 0.219 | 1.548 | 0.996 |
| WS-3500-10-1.000000 | 3500 | 35000 | -12.185 | -6.453 | 4.378 | 0.319 | 1.480 | 0.996 |
| WS-3500-2-0.000000 | 3500 | 7000 | -1156.250 | -896.088 | 0.956 | 0.644 | 1.283 | 0.916 |
| WS-3500-2-0.200000 | 3500 | 7000 | -85.427 | -73.010 | 3.584 | 0.727 | 1.598 | 0.997 |
| WS-3500-2-0.400000 | 3500 | 7000 | -68.432 | -59.220 | 4.001 | 0.924 | 1.512 | 0.998 |
| WS-3500-2-0.600000 | 3500 | 7000 | -62.180 | -54.341 | 4.175 | 1.043 | 1.465 | 0.998 |
| WS-3500-2-0.800000 | 3500 | 7000 | -55.398 | -48.446 | 3.819 | 0.934 | 1.428 | 0.995 |
| WS-3500-2-1.000000 | 3500 | 7000 | -55.398 | -48.613 | 3.885 | 0.978 | 1.421 | 0.996 |
| WS-3500-3-0.000000 | 3500 | 10500 | -1053.792 | -907.496 | 0.963 | 0.483 | 1.438 | 0.915 |
| WS-3500-3-0.200000 | 3500 | 10500 | -55.926 | -44.769 | 3.839 | 0.507 | 1.839 | 0.995 |
| WS-3500-3-0.400000 | 3500 | 10500 | -43.634 | -36.317 | 4.091 | 0.649 | 1.637 | 0.994 |
| WS-3500-3-0.600000 | 3500 | 10500 | -43.967 | -37.275 | 4.791 | 0.995 | 1.543 | 0.996 |
| WS-3500-3-0.800000 | 3500 | 10500 | -36.584 | -30.476 | 3.979 | 0.771 | 1.458 | 0.993 |
| WS-3500-3-1.000000 | 3500 | 10500 | -43.870 | -37.725 | 5.063 | 1.202 | 1.492 | 0.996 |
| WS-3500-4-0.000000 | 3500 | 14000 | -915.242 | -772.501 | 0.967 | 0.366 | 1.601 | 0.915 |
| WS-3500-4-0.200000 | 3500 | 14000 | -43.556 | -33.663 | 3.870 | 0.374 | 2.047 | 0.994 |
| WS-3500-4-0.400000 | 3500 | 14000 | -37.696 | -30.773 | 4.676 | 0.638 | 1.801 | 0.995 |
| WS-3500-4-0.600000 | 3500 | 14000 | -37.524 | -31.282 | 5.420 | 0.991 | 1.626 | 0.995 |
| WS-3500-4-0.800000 | 3500 | 14000 | -30.563 | -24.564 | 4.420 | 0.785 | 1.485 | 0.992 |
| WS-3500-4-1.000000 | 3500 | 14000 | -30.530 | -24.824 | 4.462 | 0.851 | 1.462 | 0.991 |
| WS-3500-5-0.000000 | 3500 | 17500 | -797.200 | -631.765 | 0.972 | 0.282 | 1.770 | 0.915 |
| WS-3500-5-0.200000 | 3500 | 17500 | -37.353 | -27.609 | 4.131 | 0.347 | 2.240 | 0.993 |
| WS-3500-5-0.400000 | 3500 | 17500 | -30.991 | -23.075 | 4.712 | 0.489 | 1.893 | 0.989 |
| WS-3500-5-0.600000 | 3500 | 17500 | -31.655 | -26.446 | 5.591 | 0.975 | 1.672 | 0.996 |
| WS-3500-5-0.800000 | 3500 | 17500 | -31.544 | -27.000 | 5.813 | 1.187 | 1.562 | 0.997 |
| WS-3500-5-1.000000 | 3500 | 17500 | -31.487 | -27.117 | 5.826 | 1.255 | 1.532 | 0.997 |
| WS-3500-6-0.000000 | 3500 | 21000 | -702.599 | -517.709 | 0.977 | 0.222 | 1.942 | 0.915 |
| WS-3500-6-0.200000 | 3500 | 21000 | -28.878 | -13.738 | 3.600 | 0.088 | 2.377 | 0.989 |
| WS-3500-6-0.400000 | 3500 | 21000 | -31.222 | -24.495 | 5.475 | 0.614 | 2.066 | 0.996 |
| WS-3500-6-0.600000 | 3500 | 21000 | -22.033 | -13.335 | 4.311 | 0.267 | 1.664 | 0.992 |
| WS-3500-6-0.800000 | 3500 | 21000 | -23.367 | -16.842 | 4.798 | 0.606 | 1.524 | 0.989 |
| WS-3500-6-1.000000 | 3500 | 21000 | -23.469 | -17.454 | 4.881 | 0.712 | 1.488 | 0.990 |
| WS-3500-7-0.000000 | 3500 | 24500 | -626.937 | -415.229 | 0.981 | 0.176 | 2.120 | 0.915 |
| WS-3500-7-0.200000 | 3500 | 24500 | -31.167 | -21.765 | 4.771 | 0.353 | 2.569 | 0.991 |
| WS-3500-7-0.400000 | 3500 | 24500 | -21.594 | -9.470 | 4.260 | 0.104 | 2.083 | 0.990 |
| WS-3500-7-0.600000 | 3500 | 24500 | -24.228 | -17.932 | 5.866 | 0.704 | 1.750 | 0.984 |
| WS-3500-7-0.800000 | 3500 | 24500 | -24.940 | -20.348 | 6.391 | 1.277 | 1.576 | 0.986 |
| WS-3500-7-1.000000 | 3500 | 24500 | -24.901 | -20.665 | 6.473 | 1.414 | 1.530 | 0.987 |
| WS-3500-8-0.000000 | 3500 | 28000 | -566.089 | -335.557 | 0.984 | 0.143 | 2.303 | 0.915 |
| WS-3500-8-0.200000 | 3500 | 28000 | -17.186 | 2.736 | 2.929 | 0.015 | 2.592 | 0.993 |
| WS-3500-8-0.400000 | 3500 | 28000 | -23.741 | -14.896 | 5.540 | 0.330 | 2.212 | 0.982 |
| WS-3500-8-0.600000 | 3500 | 28000 | -25.096 | -19.995 | 6.825 | 1.042 | 1.828 | 0.994 |
| WS-3500-8-0.800000 | 3500 | 28000 | -25.258 | -21.066 | 7.052 | 1.411 | 1.628 | 0.997 |
| WS-3500-8-1.000000 | 3500 | 28000 | -25.183 | -21.300 | 7.131 | 1.538 | 1.575 | 0.998 |
| WS-3500-9-0.000000 | 3500 | 31500 | -516.414 | -269.465 | 0.988 | 0.118 | 2.489 | 0.915 |
| WS-3500-9-0.200000 | 3500 | 31500 | -20.006 | -1.991 | 3.621 | 0.027 | 2.777 | 0.990 |
| WS-3500-9-0.400000 | 3500 | 31500 | -24.698 | -17.945 | 6.430 | 0.619 | 2.345 | 0.991 |
| WS-3500-9-0.600000 | 3500 | 31500 | -9.150 | -1.245 | 3.332 | 0.063 | 1.725 | 0.997 |
| WS-3500-9-0.800000 | 3500 | 31500 | -24.894 | -20.768 | 7.232 | 1.320 | 1.677 | 0.998 |
| WS-3500-9-1.000000 | 3500 | 31500 | -8.609 | -4.207 | 3.709 | 0.265 | 1.451 | 0.997 |
| WS-4000-10-0.000000 | 4000 | 40000 | -538.352 | -243.745 | 0.988 | 0.100 | 2.644 | 0.915 |
| WS-4000-10-0.200000 | 4000 | 40000 | -21.928 | -5.379 | 4.293 | 0.045 | 2.968 | 0.987 |
| WS-4000-10-0.400000 | 4000 | 40000 | -24.957 | -18.100 | 6.672 | 0.615 | 2.445 | 0.996 |
| WS-4000-10-0.600000 | 4000 | 40000 | -9.731 | -0.976 | 3.564 | 0.052 | 1.784 | 0.997 |
| WS-4000-10-0.800000 | 4000 | 40000 | -11.436 | -4.715 | 3.940 | 0.183 | 1.538 | 0.997 |
| WS-4000-10-1.000000 | 4000 | 40000 | -11.031 | -5.433 | 4.120 | 0.269 | 1.474 | 0.997 |
| WS-4000-2-0.000000 | 4000 | 8000 | -1299.311 | -1008.791 | 0.955 | 0.649 | 1.278 | 0.916 |
| WS-4000-2-0.200000 | 4000 | 8000 | -86.202 | -73.237 | 3.638 | 0.719 | 1.597 | 0.997 |
| WS-4000-2-0.400000 | 4000 | 8000 | -68.898 | -59.507 | 4.014 | 0.906 | 1.508 | 0.998 |
| WS-4000-2-0.600000 | 4000 | 8000 | -62.516 | -54.632 | 4.153 | 1.008 | 1.463 | 0.998 |
| WS-4000-2-0.800000 | 4000 | 8000 | -55.692 | -48.508 | 3.767 | 0.887 | 1.425 | 0.996 |
| WS-4000-2-1.000000 | 4000 | 8000 | -55.781 | -48.757 | 3.814 | 0.925 | 1.419 | 0.996 |
| WS-4000-3-0.000000 | 4000 | 12000 | -1195.840 | -1028.042 | 0.961 | 0.487 | 1.431 | 0.916 |
| WS-4000-3-0.200000 | 4000 | 12000 | -56.574 | -45.198 | 3.866 | 0.497 | 1.836 | 0.995 |
| WS-4000-3-0.400000 | 4000 | 12000 | -43.965 | -36.374 | 3.991 | 0.607 | 1.628 | 0.995 |
| WS-4000-3-0.600000 | 4000 | 12000 | -44.244 | -37.548 | 4.725 | 0.939 | 1.542 | 0.996 |
| WS-4000-3-0.800000 | 4000 | 12000 | -36.499 | -29.843 | 3.837 | 0.682 | 1.452 | 0.994 |
| WS-4000-3-1.000000 | 4000 | 12000 | -36.544 | -30.219 | 3.882 | 0.737 | 1.434 | 0.994 |
| WS-4000-4-0.000000 | 4000 | 16000 | -1035.037 | -882.119 | 0.966 | 0.372 | 1.590 | 0.916 |
| WS-4000-4-0.200000 | 4000 | 16000 | -43.875 | -33.771 | 3.890 | 0.366 | 2.031 | 0.993 |
| WS-4000-4-0.400000 | 4000 | 16000 | -38.088 | -30.865 | 4.621 | 0.613 | 1.799 | 0.995 |
| WS-4000-4-0.600000 | 4000 | 16000 | -29.399 | -21.055 | 3.791 | 0.399 | 1.540 | 0.993 |
| WS-4000-4-0.800000 | 4000 | 16000 | -30.326 | -23.630 | 4.179 | 0.653 | 1.476 | 0.992 |
| WS-4000-4-1.000000 | 4000 | 16000 | -30.326 | -24.063 | 4.273 | 0.727 | 1.457 | 0.993 |
| WS-4000-5-0.000000 | 4000 | 20000 | -903.676 | -728.181 | 0.970 | 0.287 | 1.755 | 0.915 |
| WS-4000-5-0.200000 | 4000 | 20000 | -37.528 | -26.953 | 4.023 | 0.305 | 2.217 | 0.991 |
| WS-4000-5-0.400000 | 4000 | 20000 | -30.941 | -22.054 | 4.541 | 0.392 | 1.887 | 0.990 |
| WS-4000-5-0.600000 | 4000 | 20000 | -32.034 | -26.574 | 5.551 | 0.959 | 1.663 | 0.995 |
| WS-4000-5-0.800000 | 4000 | 20000 | -31.941 | -27.261 | 5.799 | 1.184 | 1.553 | 0.997 |
| WS-4000-5-1.000000 | 4000 | 20000 | -31.909 | -27.414 | 5.835 | 1.252 | 1.526 | 0.997 |
| WS-4000-6-0.000000 | 4000 | 24000 | -798.640 | -600.849 | 0.974 | 0.226 | 1.924 | 0.915 |
| WS-4000-6-0.200000 | 4000 | 24000 | -28.448 | -11.446 | 3.402 | 0.057 | 2.365 | 0.991 |
| WS-4000-6-0.400000 | 4000 | 24000 | -31.685 | -24.682 | 5.477 | 0.612 | 2.059 | 0.996 |
| WS-4000-6-0.600000 | 4000 | 24000 | -21.598 | -12.112 | 4.043 | 0.200 | 1.660 | 0.994 |
| WS-4000-6-0.800000 | 4000 | 24000 | -23.077 | -15.931 | 4.508 | 0.482 | 1.513 | 0.992 |
| WS-4000-6-1.000000 | 4000 | 24000 | -23.257 | -16.672 | 4.597 | 0.585 | 1.476 | 0.992 |
| WS-4000-7-0.000000 | 4000 | 28000 | -713.025 | -485.458 | 0.978 | 0.180 | 2.099 | 0.915 |
| WS-4000-7-0.200000 | 4000 | 28000 | -30.971 | -19.929 | 4.522 | 0.246 | 2.566 | 0.989 |
| WS-4000-7-0.400000 | 4000 | 28000 | -20.862 | -7.498 | 4.004 | 0.068 | 2.080 | 0.992 |
| WS-4000-7-0.600000 | 4000 | 28000 | -24.021 | -16.919 | 5.608 | 0.549 | 1.747 | 0.985 |
| WS-4000-7-0.800000 | 4000 | 28000 | -24.833 | -19.732 | 6.146 | 1.100 | 1.569 | 0.985 |
| WS-4000-7-1.000000 | 4000 | 28000 | -24.857 | -20.072 | 6.213 | 1.213 | 1.532 | 0.985 |
| WS-4000-8-0.000000 | 4000 | 32000 | -642.994 | -389.144 | 0.982 | 0.146 | 2.277 | 0.915 |
| WS-4000-8-0.200000 | 4000 | 32000 | -31.328 | -22.101 | 5.092 | 0.365 | 2.769 | 0.995 |
| WS-4000-8-0.400000 | 4000 | 32000 | -23.389 | -13.109 | 5.253 | 0.215 | 2.226 | 0.985 |
| WS-4000-8-0.600000 | 4000 | 32000 | -25.191 | -19.748 | 6.761 | 0.970 | 1.831 | 0.991 |
| WS-4000-8-0.800000 | 4000 | 32000 | -25.526 | -21.202 | 7.088 | 1.417 | 1.616 | 0.997 |
| WS-4000-8-1.000000 | 4000 | 32000 | -25.427 | -21.415 | 7.149 | 1.540 | 1.566 | 0.997 |
| WS-4000-9-0.000000 | 4000 | 36000 | -588.018 | -317.992 | 0.985 | 0.121 | 2.459 | 0.915 |
| WS-4000-9-0.200000 | 4000 | 36000 | -19.247 | 0.413 | 3.387 | 0.018 | 2.784 | 0.992 |
| WS-4000-9-0.400000 | 4000 | 36000 | -24.634 | -17.172 | 6.284 | 0.519 | 2.351 | 0.985 |
| WS-4000-9-0.600000 | 4000 | 36000 | -25.304 | -20.013 | 7.079 | 0.994 | 1.896 | 0.998 |
| WS-4000-9-0.800000 | 4000 | 36000 | -7.243 | -2.677 | 3.382 | 0.165 | 1.500 | 0.998 |
| WS-4000-9-1.000000 | 4000 | 36000 | -25.134 | -21.185 | 7.363 | 1.456 | 1.611 | 0.999 |
